# Supplementary material for: METABOLIC: High-Throughput Profiling of Microbial Genomes for Functional Traits, Metabolism, Biogeochemistry, and Community-scale Functional Networks
Source: Research Square preprint supplement (doi:10.21203/rs.3.rs-965097/v1), 2021-10-20
Supplement: Supplementary file 2 [file 7e85eafc40c8ec92f0819def.xlsx]

## Sheet: Result
Supplementary Dataset S6. Human microbiome functional profiling result for both CRC patient and healthy control. In the healthy control genome summary and CRC genome summary columns, the percentages in each column indicate the marker-containing genome fractions. In the variation column, the variation values of marker-containing genome fractions between these two samples were labeled red if they a…
Category	Protein name	Entry no.	KEGG KO ID	Healthy control genome summary	CRC genome summary	Variation (CRC vs Healthy control)
Amino Acid Metabolism	Histidinol dehydrogenase	1	K00013	0.575758	0.5	-0.0757576
	homoserine dehydrogenase	2	K00003	0.727273	0.657895	-0.069378
	3-isopropylmalate dehydrogenase	3	K00052	0.636364	0.5	-0.136364
	ketol-acid reductoisomerase	4	K00053	0.636364	0.447368	-0.188995
	prephenate dehydrogenase	5	K00220	0	0	0
	dihydrodipicolinate reductase	6	K00215	0.878788	0.789474	-0.0893142
	L-alanine dehydrogenase	7	K00259	0.0909091	0.131579	0.0406699
	glutamate synthase large and small subunit (NADPH)	8	K00265	0.333333	0.315789	-0.0175439
	pyrroline-5-carboxylate reductase	9	K00286	0.757576	0.736842	-0.0207337
	proline dehydrogenase	10	K00318	0.030303	0.0263158	-0.00398724
	serine hydroxymethyltransferase	11	K00600	0.727273	0.815789	0.0885167
	ornithine carbamoyltransferase 1	12	K00611	0.575758	0.526316	-0.0494418
	acetyl-CoA acyltransferase anaerobic	13	K00619	0	0.0263158	0.0263158
	acetyl-CoA acyltransferase anaerobic	14	K00619	0	0.0263158	0.0263158
	serine O-acetyltransferase	15	K00640	0.69697	0.736842	0.0398724
	2-isopropylmalate synthase	16	K01649	0.636364	0.526316	-0.110048
	ATP phosphoribosyltransferase	17	K00765	0.666667	0.473684	-0.192982
	Spermidine Synthase	18	K00797	0.151515	0.236842	0.085327
	cysteine synthase A	19	K01738	0.606061	0.657895	0.0518341
	cystathionine gamma-synthase	20	K01739	0	0	0
	3-deoxy-7-phosphoheptulonate synthase	21	K01626	0.30303	0.368421	0.0653907
	branched-chain-amino-acid transaminase	22	K00826	0.69697	0.684211	-0.0127592
	valine-pyruvate aminotransferase	23	K00835	0	0	0
	homoserine kinase	24	K00872	0.787879	0.684211	-0.103668
	shikimate kinase I II	25	K00891	0.69697	0.815789	0.11882
	gamma-glutamyl kinase	26	K00931	0.69697	0.657895	-0.039075
	aspartate kinase	27	K00928	0.393939	0.342105	-0.0518341
	acetylglutamate kinase	28	K00930	0.606061	0.631579	0.0255183
	Butyryl CoA Acetate CoA Transferase	29	K01027	0	0	0
	L-glutaminase	30	K01425	0.121212	0.184211	0.0629984
	Agamintase	31	K01480	0.181818	0.184211	0.00239234
	cytosine deaminase	32	K01485	0	0	0
	phosphoribosyl-AMP cyclohydrolase	33	K01496	0.151515	0.157895	0.00637959
	phosphoribosyl-ATP pyrophosphatase	34	K01523	0.0909091	0.0526316	-0.0382775
	glutamate decarboxylase A and B PLP-dependent	35	K01580	0.181818	0.157895	-0.0239234
	Ornithine Decarboxylase	36	K01581	0.030303	0	-0.030303
	lysine decarboxylase 1	37	K01582	0	0	0
	biosynthetic arginine decarboxylase PLP-binding	38	K01583	0	0	0
	Indole-3-glycerol-phosphate synthase	39	K01609	0.242424	0.263158	0.0207337
	KDPG Aldolase	40	K01625	0.363636	0.394737	0.0311005
	L-threonine aldolase	41	K01620	0.606061	0.368421	-0.23764
	anthranilate synthase	42	K01657	0.30303	0.263158	-0.0398724
	3-dehydroquinate dehydratase	43	K03785	0.333333	0.157895	-0.175439
	dihydrodipicolinate synthase	44	K01714	0.727273	0.789474	0.062201
	dihydroxy-acid dehydratase	45	K01687	0.636364	0.526316	-0.110048
	L-threonine synthase	46	K01733	0.727273	0.710526	-0.0167464
	chorismate synthase	47	K01736	0.69697	0.763158	0.0661882
	threonine ammonia-lyase	48	K01754	0.666667	0.578947	-0.0877193
	argininosuccinate lyase	49	K01755	0.636364	0.605263	-0.0311005
	D-cysteine desulfhydrase	50	K05396	0.030303	0.0263158	-0.00398724
	aspartate racemase	51	K01779	0.272727	0.157895	-0.114833
	Diaminopimelate epimerase	52	K01778	0.818182	0.605263	-0.212919
	chorismate mutase	53	K01850	0	0	0
	aspartate-ammonia ligase	54	K01914	0.454545	0.447368	-0.00717703
	L-glutamine synthase	55	K01915	0.878788	0.894737	0.015949
	UDP-N-acetylmuramoyl-L-alanyl-D-glutamatemeso-diaminopimelate ligase	56	K01928	0.878788	0.921053	0.0422648
	adenylosuccinate synthetase	57	K01939	0.787879	0.815789	0.0279107
	arginosuccinate synthase	58	K01940	0.666667	0.631579	-0.0350877
	carbamoyl phosphate synthetase small subunit glutamine amidotransferase	59	K01955	0.545455	0.631579	0.0861244
Carbohydrate Metabolism	L-Lactate Dehydrogenase	60	K00016	0.333333	0.210526	-0.122807
	L-Lactate Dehydrogenase (cytochrome)	61	K00101	0	0	0
	serine hydroxymethyltransferase	62	K00600	0.727273	0.815789	0.0885167
	Transketolase	63	K00615	0.818182	0.842105	0.0239234
	Transaldolase	64	K00616	0.393939	0.447368	0.053429
	Pyruvate-Formate Lyase	65	K00656	0.454545	0.473684	0.0191388
	Si-Citrate Synthase	66	K01647	0.0606061	0.0263158	-0.0342903
	2-isopropylmalate synthase	67	K01649	0.636364	0.526316	-0.110048
	Glycogen Synthase	68	K00703	0.545455	0.473684	-0.0717703
	Gluconokinase	69	K00851	0.030303	0.0263158	-0.00398724
	Ribokinase	70	K00852	0.212121	0.210526	-0.0015949
	1-Phosphofructokinase	71	K00882	0.242424	0.236842	-0.00558214
	Galactokinase	72	K00849	0.242424	0.263158	0.0207337
	Propionate Kinase	73	K00932	0	0	0
	Butyrate Kinase	74	K00929	0.242424	0.236842	-0.00558214
	Butyryl CoA Acetate CoA Transferase	75	K01027	0	0	0
	Pectinase (Pectinesterase)	76	K01184	0	0	0
	alpha-Glucosidase	77	K01187	0.181818	0.236842	0.0550239
	beta-D-galactosidase	78	K01190	0.606061	0.578947	-0.0271132
	beta-D-glucuronidase	79	K01195	0.181818	0.105263	-0.076555
	beta-N-acetyl-D-hexosaminide N-acetylhexosaminohydrolase	80	K01207	0.545455	0.421053	-0.124402
	Extracellular Exopectate Hydrolase	81	K22933	0	0.0263158	0.0263158
	Cellulase (Exoglucanase)	82	K19668	0	0	0
	N-Acetylglucosamine-6-Phosphate Deacetylase	83	K01443	0.484848	0.421053	-0.0637959
	glutamate decarboxylase A and B PLP-dependent	84	K01580	0.181818	0.157895	-0.0239234
	Methylmalonyl-CaA decarboxylase	85	K01604	0.0909091	0.157895	0.0669856
	KDPG Aldolase	86	K01625	0.363636	0.394737	0.0311005
	Phosphogluconate dehydratase	87	K01690	0	0	0
	Extracellular Endopectate Lyase	88	K01728	0	0	0
	Glucuronate Isomerase	89	K01812	0.363636	0.368421	0.00478469
	Fucose Isomerase	90	K01818	0.151515	0.184211	0.0326954
	Arabinose Isomerase	91	K01804	0.30303	0.236842	-0.0661882
	Xylose Isomerase	92	K01805	0.121212	0.157895	0.0366826
	Mannose-6-Phosphate Isomerase	93	K01809	0.363636	0.605263	0.241627
	L-glutamine synthase	94	K01915	0.878788	0.894737	0.015949
Energy Metabolism	Carbon Monoxide Dehydrogenase	95	K00198	0	0	0
	glutamate synthase large and small subunit (NADPH)	96	K00265	0.333333	0.315789	-0.0175439
	serine hydroxymethyltransferase	97	K00600	0.727273	0.815789	0.0885167
	Transketolase	98	K00615	0.818182	0.842105	0.0239234
	serine O-acetyltransferase	99	K00640	0.69697	0.736842	0.0398724
	cysteine synthase A	100	K01738	0.606061	0.657895	0.0518341
	cystathionine gamma-synthase	101	K01739	0	0	0
	Acetate Kinase	102	K00925	0.787879	0.842105	0.0542265
	sulfate adenylyltransferase subunit 2	103	K00957	0.242424	0.210526	-0.0318979
	asparaginase	104	K01424	0.515152	0.631579	0.116427
	L-glutaminase	105	K01425	0.121212	0.184211	0.0629984
	aspartate-ammonia ligase	106	K01914	0.454545	0.447368	-0.00717703
	L-glutamine synthase	107	K01915	0.878788	0.894737	0.015949
	Formyltetrahydrofolate synthetase	108	K00288	0	0	0
Glycan Biosynthesis and Metabolism	UDP-N-acetylglucosamine acyltransferase	109	K00677	0.181818	0.289474	0.107656
	phospho-N-acetylmuramoyl-pentapeptide transferase	110	K01000	0.757576	0.763158	0.00558214
	N-acetyl-D-galactosamine-4-sulfate 4-sulfohydrolase	111	K01135	0	0	0
	N-acetyl-D-glucosamine-6-sulfate 6-sulfohydrolase	112	K01137	0	0	0
	beta-D-galactosidase	113	K01190	0.606061	0.578947	-0.0271132
	alpha-mannosidase	114	K01191	0.121212	0.131579	0.0103668
	Mannanase (beta-mannosidase)	115	K01192	0.121212	0.210526	0.0893142
	beta-D-glucuronidase	116	K01195	0.181818	0.105263	-0.076555
	beta-N-acetyl-D-hexosaminide N-acetylhexosaminohydrolase	117	K01207	0.545455	0.421053	-0.124402
	ADP-L-glycero-D-mannoheptose-6-epimerase NAD(P)-binding	118	K03274	0.0606061	0.0263158	-0.0342903
	UDP-N-acetylmuramoyl-L-alanyl-D-glutamatemeso-diaminopimelate ligase	119	K01928	0.878788	0.921053	0.0422648
	D-alanineD-alanine ligase	120	K01921	0.878788	0.921053	0.0422648
	UDP-N-acetylmuramateL-alanine ligase	121	K01924	0.909091	0.789474	-0.119617
	UDP-N-acetylmuramoyl-L-alanineD-glutamate ligase	122	K01925	0.787879	0.815789	0.0279107
Lipid Metabolism	acetyl-CoA acyltransferase anaerobic	123	K00632	0	0	0
	beta-ketoacyl-acyl-carrier-protein synthase III	124	K00648	0.636364	0.605263	-0.0311005
	Glycerol Kinase	125	K00864	0.484848	0.447368	-0.0374801
	Butyryl CoA Acetate CoA Transferase	126	K01027	0	0	0
	beta-D-galactosidase	127	K01190	0.606061	0.578947	-0.0271132
	Conjugated Bile Salt Hydrolase	128	K01442	0.666667	0.736842	0.0701754
Metabolism of Cofactors and Vitamins	ketol-acid reductoisomerase	129	K00053	0.636364	0.447368	-0.188995
	3-demethylubiquinone-9 3-methyltransferase	130	K00568	0	0	0
	Riboflavin Synthase ?? Subunit	131	K00793	0.30303	0.421053	0.118022
	branched-chain-amino-acid transaminase	132	K00826	0.69697	0.684211	-0.0127592
	Pyridoxal Kinase	133	K00868	0.333333	0.447368	0.114035
	Thiamin Kinase	134	K07251	0	0	0
	Cobalamin Synthase	135	K02233	0.454545	0.421053	-0.0334928
	Biotin Synthase	136	K01012	0.424242	0.473684	0.0494418
	beta-D-glucuronidase	137	K01195	0.181818	0.105263	-0.076555
	dihydroxy-acid dehydratase	138	K01687	0.636364	0.526316	-0.110048
	L-threonine synthase	139	K01733	0.727273	0.710526	-0.0167464
	Ferrochetalase	140	K01772	0	0.0526316	0.0526316
	Cobalt Chelatase	141	K02190	0.393939	0.315789	-0.0781499
	Pantothenate Synthetase	142	K01918	0.393939	0.473684	0.0797448
	Folylpolyglutamate Synthase	143	K11754	0.818182	0.763158	-0.0550239
	Formyltetrahydrofolate synthetase	144	K00288	0	0	0
	Quinolinate Synthase	145	K03517	0.454545	0.552632	0.0980861
Metabolism of Other Amino Acids	L-alanine dehydrogenase	146	K00259	0.0909091	0.131579	0.0406699
	thioredoxin reductase FAD-NADP-binding	147	K00384	0.515152	0.578947	0.0637959
	serine hydroxymethyltransferase	148	K00600	0.727273	0.815789	0.0885167
	Spermidine Synthase	149	K00797	0.151515	0.236842	0.085327
	cystathionine gamma-synthase	150	K01739	0	0	0
	Acetate Kinase	151	K00925	0.787879	0.842105	0.0542265
	sulfate adenylyltransferase subunit 2	152	K00955	0.272727	0.263158	-0.00956938
	L-Seryl-tRNASec selenium transferase	153	K01042	0.030303	0.105263	0.0749601
	asparaginase	154	K01424	0.515152	0.631579	0.116427
	L-glutaminase	155	K01425	0.121212	0.184211	0.0629984
	glutamate decarboxylase A and B PLP-dependent	156	K01580	0.181818	0.157895	-0.0239234
	Ornithine Decarboxylase	157	K01581	0.030303	0	-0.030303
	selenocysteine lyase PLP-dependent	158	K11717	0.484848	0.473684	-0.0111643
	alanine racemase	159	K01775	0.909091	0.921053	0.0119617
	glutamate racemase	160	K01776	0.727273	0.684211	-0.0430622
	methionyl-tRNA synthetase	161	K01874	0.787879	0.868421	0.0805423
	aspartate-ammonia ligase	162	K01914	0.454545	0.447368	-0.00717703
	glutathionylspermidine synthase	163	K01460	0	0	0
	Pantothenate Synthetase	164	K01918	0.393939	0.473684	0.0797448
	glutathione synthase	165	K01920	0	0	0
	D-alanineD-alanine ligase	166	K01921	0.878788	0.921053	0.0422648
	UDP-N-acetylmuramateL-alanine ligase	167	K01924	0.909091	0.789474	-0.119617
	UDP-N-acetylmuramoyl-L-alanineD-glutamate ligase	168	K01925	0.787879	0.815789	0.0279107
Metabolism of Terpenoids and Polyketides	1-hydroxy-2-methyl-2-E-butenyl 4-diphosphate reductase 4Fe-4S protein	169	K03527	0.787879	0.894737	0.106858
	Transketolase	170	K00615	0.818182	0.842105	0.0239234
	acetyl-CoA acyltransferase anaerobic	171	K00632	0	0	0
	geranyltranstransferase	172	K00795	0	0	0
	4-diphosphocytidyl-2C-methyl-D-erythritol synthase	173	K00991	0.69697	0.657895	-0.039075
Nucleotide Metabolism	IMP dehydrogenase	174	K00088	0.727273	0.710526	-0.0167464
	anaerobic ribonucleoside-triphosphate reductase	175	K00527	0	0	0
	thioredoxin reductase FAD-NADP-binding	176	K00384	0.515152	0.578947	0.0637959
	purine-nucleoside phosphorylase	177	K03783	0.363636	0.5	0.136364
	uridine phosphorylase	178	K00757	0.272727	0.394737	0.12201
	thymidine phosphorylase	179	K00758	0	0	0
	cytidylate kinase	180	K13800	0	0	0
	cytosine deaminase	181	K01485	0	0	0
	ADP-ribose pyrophosphatase	182	K01515	0.454545	0.421053	-0.0334928
	orotidine-5-phosphate decarboxylase	183	K01591	0.727273	0.789474	0.062201
	phosphoribosylglycinamide synthetase phosphoribosylamine-glycine ligase	184	K01945	0.787879	0.842105	0.0542265
	adenylosuccinate synthetase	185	K01939	0.787879	0.815789	0.0279107
	carbamoyl phosphate synthetase small subunit glutamine amidotransferase	186	K01955	0.545455	0.631579	0.0861244
Translation	L-Seryl-tRNASec selenium transferase	187	K01042	0.030303	0.105263	0.0749601
	methionyl-tRNA synthetase	188	K01874	0.787879	0.868421	0.0805423
	Serine-tRNA ligase	189	K01875	0.818182	0.815789	-0.00239234

## Sheet: Heathy control result
Heathy control (FengQ_2015 | SID532796)
Category	Protein name	Entry no.	Genome summary	KEGG KO ID	FengQ_2015__SID532796__bin.10	FengQ_2015__SID532796__bin.11	FengQ_2015__SID532796__bin.14	FengQ_2015__SID532796__bin.15	FengQ_2015__SID532796__bin.2	FengQ_2015__SID532796__bin.23	FengQ_2015__SID532796__bin.24	FengQ_2015__SID532796__bin.26	FengQ_2015__SID532796__bin.27	FengQ_2015__SID532796__bin.28	FengQ_2015__SID532796__bin.29	FengQ_2015__SID532796__bin.30	FengQ_2015__SID532796__bin.31	FengQ_2015__SID532796__bin.32	FengQ_2015__SID532796__bin.33	FengQ_2015__SID532796__bin.35	FengQ_2015__SID532796__bin.47	FengQ_2015__SID532796__bin.48	FengQ_2015__SID532796__bin.49	FengQ_2015__SID532796__bin.50	FengQ_2015__SID532796__bin.52	FengQ_2015__SID532796__bin.57	FengQ_2015__SID532796__bin.6	FengQ_2015__SID532796__bin.60	FengQ_2015__SID532796__bin.63	FengQ_2015__SID532796__bin.65	FengQ_2015__SID532796__bin.66	FengQ_2015__SID532796__bin.68	FengQ_2015__SID532796__bin.70	FengQ_2015__SID532796__bin.71	FengQ_2015__SID532796__bin.73	FengQ_2015__SID532796__bin.8	FengQ_2015__SID532796__bin.9
Amino Acid Metabolism	Histidinol dehydrogenase	1	0.575758	K00013	0	1	0	1	0	0	1	1	1	1	1	1	0	0	1	0	0	1	1	0	1	1	0	1	1	0	0	1	0	0	1	1	1
	homoserine dehydrogenase	2	0.727273	K00003	0	1	1	1	1	0	1	0	1	1	1	1	1	0	1	1	1	1	0	0	1	0	1	1	1	0	1	1	1	1	1	0	1
	3-isopropylmalate dehydrogenase	3	0.636364	K00052	0	0	0	1	0	0	0	1	1	1	1	1	1	1	1	0	0	1	1	0	1	1	1	1	1	0	1	1	1	0	0	1	1
	ketol-acid reductoisomerase	4	0.636364	K00053	0	1	0	1	0	0	1	1	1	1	1	1	1	1	0	0	0	1	1	0	1	1	1	1	1	0	0	1	0	1	1	1	0
	prephenate dehydrogenase	5	0	K00220	0	0	0	0	0	0	0	0	0	0	0	0	0	0	0	0	0	0	0	0	0	0	0	0	0	0	0	0	0	0	0	0	0
	dihydrodipicolinate reductase	6	0.878788	K00215	1	1	1	1	1	1	1	1	1	1	1	1	1	0	1	0	1	1	1	0	1	1	1	1	0	1	1	1	1	1	1	1	1
	L-alanine dehydrogenase	7	0.0909091	K00259	0	0	0	0	0	0	0	1	0	0	0	0	0	0	0	0	0	0	0	0	0	1	0	0	0	0	0	0	0	0	0	1	0
	glutamate synthase large and small subunit (NADPH)	8	0.333333	K00265	0	1	0	0	0	0	0	0	1	1	0	0	0	1	1	0	0	1	0	0	1	1	0	1	0	0	1	0	0	0	0	1	0
	pyrroline-5-carboxylate reductase	9	0.757576	K00286	0	1	1	1	0	0	1	1	1	1	1	1	1	0	1	1	1	1	1	0	1	1	1	1	1	0	0	1	1	1	1	0	1
	proline dehydrogenase	10	0.030303	K00318	1	0	0	0	0	0	0	0	0	0	0	0	0	0	0	0	0	0	0	0	0	0	0	0	0	0	0	0	0	0	0	0	0
	serine hydroxymethyltransferase	11	0.727273	K00600	1	1	0	1	1	0	0	1	1	1	1	1	1	0	1	1	1	1	0	1	1	1	1	1	1	0	1	0	0	0	1	1	1
	ornithine carbamoyltransferase 1	12	0.575758	K00611	1	1	1	0	0	0	1	0	1	1	1	1	1	0	1	1	1	1	0	0	0	0	1	1	0	0	0	1	1	1	0	0	1
	acetyl-CoA acyltransferase anaerobic	13	0	K00619	0	0	0	0	0	0	0	0	0	0	0	0	0	0	0	0	0	0	0	0	0	0	0	0	0	0	0	0	0	0	0	0	0
	acetyl-CoA acyltransferase anaerobic	14	0	K00619	0	0	0	0	0	0	0	0	0	0	0	0	0	0	0	0	0	0	0	0	0	0	0	0	0	0	0	0	0	0	0	0	0
	serine O-acetyltransferase	15	0.69697	K00640	0	0	1	1	0	1	0	1	1	1	1	1	1	1	1	1	1	1	1	0	1	1	1	1	1	0	0	0	0	0	1	1	1
	2-isopropylmalate synthase	16	0.636364	K01649	0	0	0	1	0	0	1	1	1	1	1	1	1	0	1	0	0	1	0	0	1	1	1	1	1	0	1	1	1	0	1	1	1
	ATP phosphoribosyltransferase	17	0.666667	K00765	0	1	0	1	0	0	1	1	1	1	1	1	0	1	1	0	1	1	1	0	1	1	0	1	1	0	0	1	1	0	1	1	1
	Spermidine Synthase	18	0.151515	K00797	0	1	0	0	0	0	1	0	0	0	0	1	0	0	0	0	0	1	0	0	0	0	0	0	0	0	0	0	0	0	0	0	1
	cysteine synthase A	19	0.606061	K01738	0	1	1	0	0	0	1	1	1	1	1	1	1	0	0	1	1	1	1	0	1	1	0	1	1	0	0	0	1	0	0	1	1
	cystathionine gamma-synthase	20	0	K01739	0	0	0	0	0	0	0	0	0	0	0	0	0	0	0	0	0	0	0	0	0	0	0	0	0	0	0	0	0	0	0	0	0
	3-deoxy-7-phosphoheptulonate synthase	21	0.30303	K01626	0	0	0	0	0	0	1	0	0	1	0	0	1	1	0	0	0	1	0	0	1	0	0	1	0	0	0	1	1	1	0	0	0
	branched-chain-amino-acid transaminase	22	0.69697	K00826	1	0	1	1	0	0	1	1	1	1	0	1	1	1	1	0	1	1	1	0	1	1	0	1	1	0	0	1	0	1	1	1	1
	valine-pyruvate aminotransferase	23	0	K00835	0	0	0	0	0	0	0	0	0	0	0	0	0	0	0	0	0	0	0	0	0	0	0	0	0	0	0	0	0	0	0	0	0
	homoserine kinase	24	0.787879	K00872	1	1	1	1	1	0	1	0	1	1	1	1	1	1	1	0	1	1	1	0	1	0	1	1	1	0	1	1	1	1	1	0	1
	shikimate kinase I II	25	0.69697	K00891	1	1	0	1	0	0	1	1	1	1	1	1	1	1	1	1	1	1	0	0	1	0	0	1	0	0	0	1	1	1	1	1	1
	gamma-glutamyl kinase	26	0.69697	K00931	0	1	0	0	1	0	1	1	1	1	1	1	0	1	1	1	1	1	0	0	1	1	1	1	1	0	0	1	1	1	0	1	1
	aspartate kinase	27	0.393939	K00928	0	1	0	0	1	0	1	0	1	0	1	1	0	0	0	0	1	0	0	0	0	1	1	1	1	0	1	0	0	0	0	1	0
	acetylglutamate kinase	28	0.606061	K00930	0	1	1	1	0	0	1	1	1	1	1	1	0	1	1	0	1	1	0	0	1	1	0	1	0	0	0	1	1	0	0	1	1
	Butyryl CoA Acetate CoA Transferase	29	0	K01027	0	0	0	0	0	0	0	0	0	0	0	0	0	0	0	0	0	0	0	0	0	0	0	0	0	0	0	0	0	0	0	0	0
	L-glutaminase	30	0.121212	K01425	0	0	0	0	0	0	0	1	0	0	0	0	0	0	0	0	0	0	0	0	0	1	0	0	0	0	0	0	0	1	0	1	0
	Agamintase	31	0.181818	K01480	1	1	0	0	0	0	0	0	0	0	0	1	1	0	0	0	0	0	0	0	0	0	0	0	0	0	0	0	0	1	0	0	1
	cytosine deaminase	32	0	K01485	0	0	0	0	0	0	0	0	0	0	0	0	0	0	0	0	0	0	0	0	0	0	0	0	0	0	0	0	0	0	0	0	0
	phosphoribosyl-AMP cyclohydrolase	33	0.151515	K01496	0	0	0	0	0	0	1	0	0	0	0	0	0	0	0	0	1	0	0	0	0	0	0	1	0	0	0	1	1	0	0	0	0
	phosphoribosyl-ATP pyrophosphatase	34	0.0909091	K01523	0	0	0	0	0	0	0	0	0	0	1	0	0	0	0	0	0	0	1	0	0	0	0	0	1	0	0	0	0	0	0	0	0
	glutamate decarboxylase A and B PLP-dependent	35	0.181818	K01580	1	0	0	0	0	0	0	1	0	0	0	0	0	1	0	0	0	0	0	0	0	1	0	0	0	0	0	0	1	0	0	1	0
	Ornithine Decarboxylase	36	0.030303	K01581	0	0	0	0	0	0	0	0	0	0	0	0	0	0	0	0	0	0	0	0	0	0	0	0	0	0	0	0	0	1	0	0	0
	lysine decarboxylase 1	37	0	K01582	0	0	0	0	0	0	0	0	0	0	0	0	0	0	0	0	0	0	0	0	0	0	0	0	0	0	0	0	0	0	0	0	0
	biosynthetic arginine decarboxylase PLP-binding	38	0	K01583	0	0	0	0	0	0	0	0	0	0	0	0	0	0	0	0	0	0	0	0	0	0	0	0	0	0	0	0	0	0	0	0	0
	Indole-3-glycerol-phosphate synthase	39	0.242424	K01609	0	0	0	0	0	0	1	0	0	0	0	1	0	0	1	0	0	0	0	0	1	0	0	1	0	0	0	1	0	1	0	0	1
	KDPG Aldolase	40	0.363636	K01625	0	0	1	1	0	0	1	0	1	0	0	0	0	0	0	1	1	1	0	0	1	1	0	0	1	0	0	0	0	0	1	1	0
	L-threonine aldolase	41	0.606061	K01620	1	1	1	1	0	0	1	0	1	1	1	1	1	1	1	1	0	1	0	0	0	1	1	0	0	0	0	1	1	1	0	1	0
	anthranilate synthase	42	0.30303	K01657	0	0	0	1	0	0	1	0	0	0	0	0	0	0	1	0	1	0	0	0	1	1	0	1	0	0	0	1	0	0	0	1	1
	3-dehydroquinate dehydratase	43	0.333333	K03785	0	1	0	1	0	0	1	0	1	1	0	1	0	0	1	0	0	1	0	0	1	0	1	1	0	0	0	0	0	0	0	0	0
	dihydrodipicolinate synthase	44	0.727273	K01714	1	1	1	0	1	1	1	1	1	1	1	1	1	0	1	0	1	0	1	0	1	0	1	1	0	1	1	1	1	0	1	0	1
	dihydroxy-acid dehydratase	45	0.636364	K01687	0	1	0	0	0	0	0	1	1	1	1	1	0	1	1	1	1	1	0	0	1	1	1	1	1	0	0	1	0	1	1	1	1
	L-threonine synthase	46	0.727273	K01733	0	1	1	0	1	0	1	1	1	1	1	1	1	0	1	1	1	1	1	0	1	1	1	1	0	0	1	1	0	1	0	1	1
	chorismate synthase	47	0.69697	K01736	1	1	1	0	0	0	1	1	1	1	1	1	1	0	1	1	0	1	0	0	1	1	0	1	1	0	0	1	1	1	1	1	1
	threonine ammonia-lyase	48	0.666667	K01754	0	1	0	1	0	0	1	0	1	1	1	1	1	1	1	0	1	1	1	0	1	0	1	1	1	0	0	1	1	1	1	0	1
	argininosuccinate lyase	49	0.636364	K01755	0	0	1	1	0	0	1	1	1	1	1	1	0	1	1	1	1	1	0	0	1	1	0	1	0	0	0	1	1	0	1	1	1
	D-cysteine desulfhydrase	50	0.030303	K05396	0	0	0	0	0	0	0	0	0	0	0	0	0	0	0	0	0	0	0	0	0	0	0	0	0	0	0	0	0	0	1	0	0
	aspartate racemase	51	0.272727	K01779	0	0	1	0	0	1	0	0	0	0	0	0	1	0	0	0	0	0	0	0	0	0	0	1	1	0	1	1	1	0	1	0	0
	Diaminopimelate epimerase	52	0.818182	K01778	1	0	0	1	1	1	1	1	1	1	1	1	1	0	1	0	1	1	0	1	1	1	1	1	1	1	0	1	1	1	1	1	1
	chorismate mutase	53	0	K01850	0	0	0	0	0	0	0	0	0	0	0	0	0	0	0	0	0	0	0	0	0	0	0	0	0	0	0	0	0	0	0	0	0
	aspartate-ammonia ligase	54	0.454545	K01914	0	1	0	0	0	0	1	1	1	1	1	1	1	0	1	1	1	1	0	0	0	1	0	0	0	0	1	0	0	0	0	1	0
	L-glutamine synthase	55	0.878788	K01915	1	1	1	1	1	0	1	1	1	1	1	1	1	1	1	1	1	1	0	0	1	1	1	1	1	0	1	1	1	1	1	1	1
	UDP-N-acetylmuramoyl-L-alanyl-D-glutamatemeso-diaminopimelate ligase	56	0.878788	K01928	1	1	1	1	1	1	1	1	1	1	1	1	1	1	1	1	0	1	0	1	1	1	1	1	0	1	1	1	1	1	0	1	1
	adenylosuccinate synthetase	57	0.787879	K01939	1	1	1	1	0	0	1	1	1	1	1	1	0	0	1	1	1	1	1	0	1	1	1	1	1	0	1	1	1	1	0	1	1
	arginosuccinate synthase	58	0.666667	K01940	0	0	1	1	0	0	1	1	1	1	1	1	0	1	1	0	1	1	0	0	1	1	1	1	0	0	0	1	1	1	1	1	1
	carbamoyl phosphate synthetase small subunit glutamine amidotransferase	59	0.545455	K01955	0	0	1	0	1	0	0	1	1	1	1	0	0	1	1	0	0	1	0	0	1	1	1	1	0	0	1	1	1	0	0	1	1
Carbohydrate Metabolism	L-Lactate Dehydrogenase	60	0.333333	K00016	0	0	1	0	0	1	1	0	0	1	1	0	0	0	0	0	1	1	0	0	0	0	0	1	0	1	0	1	0	0	1	0	0
	L-Lactate Dehydrogenase (cytochrome)	61	0	K00101	0	0	0	0	0	0	0	0	0	0	0	0	0	0	0	0	0	0	0	0	0	0	0	0	0	0	0	0	0	0	0	0	0
	serine hydroxymethyltransferase	62	0.727273	K00600	1	1	0	1	1	0	0	1	1	1	1	1	1	0	1	1	1	1	0	1	1	1	1	1	1	0	1	0	0	0	1	1	1
	Transketolase	63	0.818182	K00615	1	1	1	0	1	1	1	1	1	1	1	1	1	1	1	1	1	1	0	0	1	1	0	1	1	1	0	1	0	1	1	1	1
	Transaldolase	64	0.393939	K00616	0	1	1	0	0	0	1	0	0	1	1	1	0	0	0	0	0	1	0	0	1	1	0	1	0	0	1	1	0	0	0	1	0
	Pyruvate-Formate Lyase	65	0.454545	K00656	0	0	1	0	0	1	1	0	1	0	0	0	1	0	1	0	0	1	0	0	1	0	0	1	1	1	0	1	0	0	1	1	1
	Si-Citrate Synthase	66	0.0606061	K01647	0	0	0	0	0	0	0	0	0	0	0	0	0	0	0	0	0	0	0	0	0	0	0	0	0	0	0	1	1	0	0	0	0
	2-isopropylmalate synthase	67	0.636364	K01649	0	0	0	1	0	0	1	1	1	1	1	1	1	0	1	0	0	1	0	0	1	1	1	1	1	0	1	1	1	0	1	1	1
	Glycogen Synthase	68	0.545455	K00703	0	1	0	1	0	0	1	0	1	1	1	1	0	0	1	1	1	1	1	0	1	0	1	1	1	0	1	0	0	0	0	0	1
	Gluconokinase	69	0.030303	K00851	0	0	0	0	0	0	0	0	0	0	0	0	0	0	0	0	0	0	0	0	0	0	0	0	0	0	0	0	1	0	0	0	0
	Ribokinase	70	0.212121	K00852	0	0	1	0	0	0	0	0	0	0	1	0	0	0	0	1	1	0	0	0	1	0	0	0	0	0	0	0	1	0	1	0	0
	1-Phosphofructokinase	71	0.242424	K00882	0	1	0	0	0	0	1	0	1	1	0	1	0	0	0	0	0	1	0	0	0	0	1	0	0	0	1	0	0	0	0	0	0
	Galactokinase	72	0.242424	K00849	0	0	0	0	0	0	0	1	0	1	0	0	0	1	0	0	0	1	0	0	0	0	0	1	0	0	0	1	1	0	0	1	0
	Propionate Kinase	73	0	K00932	0	0	0	0	0	0	0	0	0	0	0	0	0	0	0	0	0	0	0	0	0	0	0	0	0	0	0	0	0	0	0	0	0
	Butyrate Kinase	74	0.242424	K00929	1	1	0	0	0	0	0	0	1	0	0	0	1	0	0	1	0	0	0	0	0	1	0	0	0	0	0	0	0	1	0	1	0
	Butyryl CoA Acetate CoA Transferase	75	0	K01027	0	0	0	0	0	0	0	0	0	0	0	0	0	0	0	0	0	0	0	0	0	0	0	0	0	0	0	0	0	0	0	0	0
	Pectinase (Pectinesterase)	76	0	K01184	0	0	0	0	0	0	0	0	0	0	0	0	0	0	0	0	0	0	0	0	0	0	0	0	0	0	0	0	0	0	0	0	0
	alpha-Glucosidase	77	0.181818	K01187	0	0	0	0	0	0	1	1	0	1	0	0	0	0	1	0	0	0	0	0	0	0	0	0	0	0	0	1	1	0	0	0	0
	beta-D-galactosidase	78	0.606061	K01190	0	1	1	0	0	0	1	1	1	1	0	0	0	1	1	0	1	1	0	0	0	1	1	1	1	0	1	1	1	0	1	1	1
	beta-D-glucuronidase	79	0.181818	K01195	0	1	0	0	0	0	0	0	1	0	0	0	0	0	0	0	0	1	0	0	0	0	1	1	0	0	0	0	0	0	0	1	0
	beta-N-acetyl-D-hexosaminide N-acetylhexosaminohydrolase	80	0.545455	K01207	0	1	0	0	0	0	0	1	1	1	1	0	1	0	1	0	1	1	1	0	1	1	0	1	0	0	1	1	1	0	1	1	0
	Extracellular Exopectate Hydrolase	81	0	K22933	0	0	0	0	0	0	0	0	0	0	0	0	0	0	0	0	0	0	0	0	0	0	0	0	0	0	0	0	0	0	0	0	0
	Cellulase (Exoglucanase)	82	0	K19668	0	0	0	0	0	0	0	0	0	0	0	0	0	0	0	0	0	0	0	0	0	0	0	0	0	0	0	0	0	0	0	0	0
	N-Acetylglucosamine-6-Phosphate Deacetylase	83	0.484848	K01443	0	1	1	0	0	0	1	0	1	1	0	1	0	1	1	0	0	1	0	0	1	1	0	0	1	0	0	1	0	1	1	1	0
	glutamate decarboxylase A and B PLP-dependent	84	0.181818	K01580	1	0	0	0	0	0	0	1	0	0	0	0	0	1	0	0	0	0	0	0	0	1	0	0	0	0	0	0	1	0	0	1	0
	Methylmalonyl-CaA decarboxylase	85	0.0909091	K01604	1	0	0	0	0	0	0	1	0	0	0	0	0	0	0	0	0	0	0	0	0	0	0	0	0	0	0	0	0	0	0	1	0
	KDPG Aldolase	86	0.363636	K01625	0	0	1	1	0	0	1	0	1	0	0	0	0	0	0	1	1	1	0	0	1	1	0	0	1	0	0	0	0	0	1	1	0
	Phosphogluconate dehydratase	87	0	K01690	0	0	0	0	0	0	0	0	0	0	0	0	0	0	0	0	0	0	0	0	0	0	0	0	0	0	0	0	0	0	0	0	0
	Extracellular Endopectate Lyase	88	0	K01728	0	0	0	0	0	0	0	0	0	0	0	0	0	0	0	0	0	0	0	0	0	0	0	0	0	0	0	0	0	0	0	0	0
	Glucuronate Isomerase	89	0.363636	K01812	0	1	1	1	0	0	0	0	1	0	0	1	0	0	0	1	1	1	0	0	1	1	1	0	0	0	0	0	0	0	1	0	0
	Fucose Isomerase	90	0.151515	K01818	0	0	0	0	0	0	1	0	0	0	0	0	0	0	0	0	1	0	0	0	0	0	0	1	1	0	0	0	0	0	1	0	0
	Arabinose Isomerase	91	0.30303	K01804	0	1	0	0	0	0	1	0	1	1	0	0	0	0	0	0	1	1	0	0	1	0	0	0	0	0	1	0	1	0	0	1	0
	Xylose Isomerase	92	0.121212	K01805	0	0	0	0	0	0	0	0	0	0	0	0	0	0	1	0	0	0	0	0	0	1	0	0	0	0	0	0	1	0	0	0	1
	Mannose-6-Phosphate Isomerase	93	0.363636	K01809	1	1	1	0	0	0	0	1	1	0	0	0	0	1	0	0	0	1	0	0	1	0	0	1	0	0	0	0	0	0	1	1	1
	L-glutamine synthase	94	0.878788	K01915	1	1	1	1	1	0	1	1	1	1	1	1	1	1	1	1	1	1	0	0	1	1	1	1	1	0	1	1	1	1	1	1	1
Energy Metabolism	Carbon Monoxide Dehydrogenase	95	0	K00198	0	0	0	0	0	0	0	0	0	0	0	0	0	0	0	0	0	0	0	0	0	0	0	0	0	0	0	0	0	0	0	0	0
	glutamate synthase large and small subunit (NADPH)	96	0.333333	K00265	0	1	0	0	0	0	0	0	1	1	0	0	0	1	1	0	0	1	0	0	1	1	0	1	0	0	1	0	0	0	0	1	0
	serine hydroxymethyltransferase	97	0.727273	K00600	1	1	0	1	1	0	0	1	1	1	1	1	1	0	1	1	1	1	0	1	1	1	1	1	1	0	1	0	0	0	1	1	1
	Transketolase	98	0.818182	K00615	1	1	1	0	1	1	1	1	1	1	1	1	1	1	1	1	1	1	0	0	1	1	0	1	1	1	0	1	0	1	1	1	1
	serine O-acetyltransferase	99	0.69697	K00640	0	0	1	1	0	1	0	1	1	1	1	1	1	1	1	1	1	1	1	0	1	1	1	1	1	0	0	0	0	0	1	1	1
	cysteine synthase A	100	0.606061	K01738	0	1	1	0	0	0	1	1	1	1	1	1	1	0	0	1	1	1	1	0	1	1	0	1	1	0	0	0	1	0	0	1	1
	cystathionine gamma-synthase	101	0	K01739	0	0	0	0	0	0	0	0	0	0	0	0	0	0	0	0	0	0	0	0	0	0	0	0	0	0	0	0	0	0	0	0	0
	Acetate Kinase	102	0.787879	K00925	1	0	1	1	0	1	1	1	1	1	1	1	1	0	1	1	1	1	0	0	1	1	1	1	0	1	1	1	1	1	0	1	1
	sulfate adenylyltransferase subunit 2	103	0.242424	K00957	0	0	0	1	0	0	1	0	0	1	0	0	0	0	0	0	1	0	1	0	1	0	0	1	0	0	0	0	0	0	0	1	0
	asparaginase	104	0.515152	K01424	1	1	1	1	0	0	0	1	1	0	0	0	1	0	1	1	1	1	0	0	0	1	0	1	0	0	1	0	1	0	0	1	1
	L-glutaminase	105	0.121212	K01425	0	0	0	0	0	0	0	1	0	0	0	0	0	0	0	0	0	0	0	0	0	1	0	0	0	0	0	0	0	1	0	1	0
	aspartate-ammonia ligase	106	0.454545	K01914	0	1	0	0	0	0	1	1	1	1	1	1	1	0	1	1	1	1	0	0	0	1	0	0	0	0	1	0	0	0	0	1	0
	L-glutamine synthase	107	0.878788	K01915	1	1	1	1	1	0	1	1	1	1	1	1	1	1	1	1	1	1	0	0	1	1	1	1	1	0	1	1	1	1	1	1	1
	Formyltetrahydrofolate synthetase	108	0	K00288	0	0	0	0	0	0	0	0	0	0	0	0	0	0	0	0	0	0	0	0	0	0	0	0	0	0	0	0	0	0	0	0	0
Glycan Biosynthesis and Metabolism	UDP-N-acetylglucosamine acyltransferase	109	0.181818	K00677	1	0	0	0	0	0	0	1	0	0	0	0	0	1	0	0	0	0	0	0	0	1	0	0	0	0	0	0	0	1	0	1	0
	phospho-N-acetylmuramoyl-pentapeptide transferase	110	0.757576	K01000	1	1	1	1	1	1	1	1	1	0	1	0	1	1	1	1	1	1	1	0	1	1	0	0	0	1	1	1	1	0	1	1	0
	N-acetyl-D-galactosamine-4-sulfate 4-sulfohydrolase	111	0	K01135	0	0	0	0	0	0	0	0	0	0	0	0	0	0	0	0	0	0	0	0	0	0	0	0	0	0	0	0	0	0	0	0	0
	N-acetyl-D-glucosamine-6-sulfate 6-sulfohydrolase	112	0	K01137	0	0	0	0	0	0	0	0	0	0	0	0	0	0	0	0	0	0	0	0	0	0	0	0	0	0	0	0	0	0	0	0	0
	beta-D-galactosidase	113	0.606061	K01190	0	1	1	0	0	0	1	1	1	1	0	0	0	1	1	0	1	1	0	0	0	1	1	1	1	0	1	1	1	0	1	1	1
	alpha-mannosidase	114	0.121212	K01191	0	1	0	0	0	0	0	0	0	0	0	0	0	0	0	0	0	0	0	0	0	0	0	0	0	0	0	0	1	0	1	1	0
	Mannanase (beta-mannosidase)	115	0.121212	K01192	0	0	0	0	0	0	0	1	0	0	0	0	0	0	0	0	0	0	0	0	0	0	0	0	0	0	0	0	1	0	0	1	1
	beta-D-glucuronidase	116	0.181818	K01195	0	1	0	0	0	0	0	0	1	0	0	0	0	0	0	0	0	1	0	0	0	0	1	1	0	0	0	0	0	0	0	1	0
	beta-N-acetyl-D-hexosaminide N-acetylhexosaminohydrolase	117	0.545455	K01207	0	1	0	0	0	0	0	1	1	1	1	0	1	0	1	0	1	1	1	0	1	1	0	1	0	0	1	1	1	0	1	1	0
	ADP-L-glycero-D-mannoheptose-6-epimerase NAD(P)-binding	118	0.0606061	K03274	0	0	0	0	0	0	0	0	0	0	0	0	0	1	0	0	0	0	0	0	0	0	0	0	0	0	0	0	0	1	0	0	0
	UDP-N-acetylmuramoyl-L-alanyl-D-glutamatemeso-diaminopimelate ligase	119	0.878788	K01928	1	1	1	1	1	1	1	1	1	1	1	1	1	1	1	1	0	1	0	1	1	1	1	1	0	1	1	1	1	1	0	1	1
	D-alanineD-alanine ligase	120	0.878788	K01921	1	0	1	1	1	1	1	1	1	0	1	1	1	1	1	1	1	1	0	1	0	1	1	1	1	1	1	1	1	1	1	1	1
	UDP-N-acetylmuramateL-alanine ligase	121	0.909091	K01924	1	0	1	1	1	1	1	1	1	1	1	1	1	1	1	1	1	1	1	1	0	1	1	1	0	1	1	1	1	1	1	1	1
	UDP-N-acetylmuramoyl-L-alanineD-glutamate ligase	122	0.787879	K01925	1	1	1	0	1	1	1	1	1	1	1	1	1	1	1	1	0	1	1	1	1	1	1	0	0	1	0	1	0	0	1	1	1
Lipid Metabolism	acetyl-CoA acyltransferase anaerobic	123	0	K00632	0	0	0	0	0	0	0	0	0	0	0	0	0	0	0	0	0	0	0	0	0	0	0	0	0	0	0	0	0	0	0	0	0
	beta-ketoacyl-acyl-carrier-protein synthase III	124	0.636364	K00648	1	0	1	1	0	1	0	1	1	1	1	1	1	1	1	0	1	1	0	0	1	0	1	1	0	1	0	0	0	1	0	1	1
	Glycerol Kinase	125	0.484848	K00864	0	1	1	0	0	0	1	0	1	1	1	1	1	0	0	1	0	1	0	0	0	0	1	0	1	0	1	0	0	0	1	1	1
	Butyryl CoA Acetate CoA Transferase	126	0	K01027	0	0	0	0	0	0	0	0	0	0	0	0	0	0	0	0	0	0	0	0	0	0	0	0	0	0	0	0	0	0	0	0	0
	beta-D-galactosidase	127	0.606061	K01190	0	1	1	0	0	0	1	1	1	1	0	0	0	1	1	0	1	1	0	0	0	1	1	1	1	0	1	1	1	0	1	1	1
	Conjugated Bile Salt Hydrolase	128	0.666667	K01442	1	1	1	0	0	1	1	1	1	1	0	0	1	0	1	0	1	1	1	0	0	1	0	1	1	0	1	1	1	0	1	1	1
Metabolism of Cofactors and Vitamins	ketol-acid reductoisomerase	129	0.636364	K00053	0	1	0	1	0	0	1	1	1	1	1	1	1	1	0	0	0	1	1	0	1	1	1	1	1	0	0	1	0	1	1	1	0
	3-demethylubiquinone-9 3-methyltransferase	130	0	K00568	0	0	0	0	0	0	0	0	0	0	0	0	0	0	0	0	0	0	0	0	0	0	0	0	0	0	0	0	0	0	0	0	0
	Riboflavin Synthase ?? Subunit	131	0.30303	K00793	1	0	0	0	1	0	1	1	0	1	1	0	0	0	0	0	0	0	0	0	1	0	0	1	0	0	0	0	0	1	0	1	0
	branched-chain-amino-acid transaminase	132	0.69697	K00826	1	0	1	1	0	0	1	1	1	1	0	1	1	1	1	0	1	1	1	0	1	1	0	1	1	0	0	1	0	1	1	1	1
	Pyridoxal Kinase	133	0.333333	K00868	0	1	1	0	0	0	0	0	0	0	0	0	0	0	1	1	1	0	1	0	0	0	0	0	0	0	1	1	1	1	0	0	1
	Thiamin Kinase	134	0	K07251	0	0	0	0	0	0	0	0	0	0	0	0	0	0	0	0	0	0	0	0	0	0	0	0	0	0	0	0	0	0	0	0	0
	Cobalamin Synthase	135	0.454545	K02233	0	1	0	1	1	0	1	0	1	1	0	1	1	0	0	1	1	1	0	0	0	1	1	0	0	0	1	0	0	0	0	1	0
	Biotin Synthase	136	0.424242	K01012	1	0	0	1	0	0	1	1	0	1	1	0	0	1	0	0	1	1	0	0	1	1	0	1	0	0	0	0	0	0	0	1	1
	beta-D-glucuronidase	137	0.181818	K01195	0	1	0	0	0	0	0	0	1	0	0	0	0	0	0	0	0	1	0	0	0	0	1	1	0	0	0	0	0	0	0	1	0
	dihydroxy-acid dehydratase	138	0.636364	K01687	0	1	0	0	0	0	0	1	1	1	1	1	0	1	1	1	1	1	0	0	1	1	1	1	1	0	0	1	0	1	1	1	1
	L-threonine synthase	139	0.727273	K01733	0	1	1	0	1	0	1	1	1	1	1	1	1	0	1	1	1	1	1	0	1	1	1	1	0	0	1	1	0	1	0	1	1
	Ferrochetalase	140	0	K01772	0	0	0	0	0	0	0	0	0	0	0	0	0	0	0	0	0	0	0	0	0	0	0	0	0	0	0	0	0	0	0	0	0
	Cobalt Chelatase	141	0.393939	K02190	0	1	0	0	1	0	1	0	1	1	0	1	0	0	0	0	1	1	0	0	0	1	1	0	0	0	1	0	0	0	1	1	0
	Pantothenate Synthetase	142	0.393939	K01918	1	0	0	1	0	0	1	1	0	1	0	0	1	1	0	0	1	1	0	0	1	0	0	1	0	0	0	0	0	1	0	1	0
	Folylpolyglutamate Synthase	143	0.818182	K11754	1	1	1	1	0	1	1	1	1	1	0	1	1	1	1	0	1	1	0	0	1	1	0	1	1	1	1	1	1	1	1	1	1
	Formyltetrahydrofolate synthetase	144	0	K00288	0	0	0	0	0	0	0	0	0	0	0	0	0	0	0	0	0	0	0	0	0	0	0	0	0	0	0	0	0	0	0	0	0
	Quinolinate Synthase	145	0.454545	K03517	1	0	1	1	0	0	1	1	0	1	0	0	0	0	1	0	1	1	1	0	0	1	0	1	1	0	0	1	0	0	0	0	1
Metabolism of Other Amino Acids	L-alanine dehydrogenase	146	0.0909091	K00259	0	0	0	0	0	0	0	1	0	0	0	0	0	0	0	0	0	0	0	0	0	1	0	0	0	0	0	0	0	0	0	1	0
	thioredoxin reductase FAD-NADP-binding	147	0.515152	K00384	1	0	1	0	0	0	1	1	0	0	0	0	1	1	1	1	0	0	1	0	0	1	0	0	1	0	0	1	1	1	1	1	1
	serine hydroxymethyltransferase	148	0.727273	K00600	1	1	0	1	1	0	0	1	1	1	1	1	1	0	1	1	1	1	0	1	1	1	1	1	1	0	1	0	0	0	1	1	1
	Spermidine Synthase	149	0.151515	K00797	0	1	0	0	0	0	1	0	0	0	0	1	0	0	0	0	0	1	0	0	0	0	0	0	0	0	0	0	0	0	0	0	1
	cystathionine gamma-synthase	150	0	K01739	0	0	0	0	0	0	0	0	0	0	0	0	0	0	0	0	0	0	0	0	0	0	0	0	0	0	0	0	0	0	0	0	0
	Acetate Kinase	151	0.787879	K00925	1	0	1	1	0	1	1	1	1	1	1	1	1	0	1	1	1	1	0	0	1	1	1	1	0	1	1	1	1	1	0	1	1
	sulfate adenylyltransferase subunit 2	152	0.272727	K00955	0	0	0	1	0	0	1	0	0	1	0	0	0	0	0	0	1	0	1	0	1	1	0	1	0	0	0	0	0	0	0	1	0
	L-Seryl-tRNASec selenium transferase	153	0.030303	K01042	0	0	0	0	0	0	0	0	0	0	0	0	0	0	0	1	0	0	0	0	0	0	0	0	0	0	0	0	0	0	0	0	0
	asparaginase	154	0.515152	K01424	1	1	1	1	0	0	0	1	1	0	0	0	1	0	1	1	1	1	0	0	0	1	0	1	0	0	1	0	1	0	0	1	1
	L-glutaminase	155	0.121212	K01425	0	0	0	0	0	0	0	1	0	0	0	0	0	0	0	0	0	0	0	0	0	1	0	0	0	0	0	0	0	1	0	1	0
	glutamate decarboxylase A and B PLP-dependent	156	0.181818	K01580	1	0	0	0	0	0	0	1	0	0	0	0	0	1	0	0	0	0	0	0	0	1	0	0	0	0	0	0	1	0	0	1	0
	Ornithine Decarboxylase	157	0.030303	K01581	0	0	0	0	0	0	0	0	0	0	0	0	0	0	0	0	0	0	0	0	0	0	0	0	0	0	0	0	0	1	0	0	0
	selenocysteine lyase PLP-dependent	158	0.484848	K11717	1	1	1	0	0	1	0	1	0	0	0	0	0	1	0	0	0	1	1	0	0	1	0	0	0	1	1	1	1	1	0	1	1
	alanine racemase	159	0.909091	K01775	1	1	1	1	1	1	1	1	1	1	1	1	1	0	1	1	1	1	1	0	1	1	1	1	0	1	1	1	1	1	1	1	1
	glutamate racemase	160	0.727273	K01776	1	0	1	0	1	0	1	1	1	1	1	1	1	0	1	1	1	1	0	0	0	1	1	1	0	0	1	1	1	1	1	1	1
	methionyl-tRNA synthetase	161	0.787879	K01874	1	0	1	1	1	1	1	1	0	1	1	1	1	0	1	1	1	1	0	0	0	1	0	1	1	1	1	1	1	1	1	1	1
	aspartate-ammonia ligase	162	0.454545	K01914	0	1	0	0	0	0	1	1	1	1	1	1	1	0	1	1	1	1	0	0	0	1	0	0	0	0	1	0	0	0	0	1	0
	glutathionylspermidine synthase	163	0	K01460	0	0	0	0	0	0	0	0	0	0	0	0	0	0	0	0	0	0	0	0	0	0	0	0	0	0	0	0	0	0	0	0	0
	Pantothenate Synthetase	164	0.393939	K01918	1	0	0	1	0	0	1	1	0	1	0	0	1	1	0	0	1	1	0	0	1	0	0	1	0	0	0	0	0	1	0	1	0
	glutathione synthase	165	0	K01920	0	0	0	0	0	0	0	0	0	0	0	0	0	0	0	0	0	0	0	0	0	0	0	0	0	0	0	0	0	0	0	0	0
	D-alanineD-alanine ligase	166	0.878788	K01921	1	0	1	1	1	1	1	1	1	0	1	1	1	1	1	1	1	1	0	1	0	1	1	1	1	1	1	1	1	1	1	1	1
	UDP-N-acetylmuramateL-alanine ligase	167	0.909091	K01924	1	0	1	1	1	1	1	1	1	1	1	1	1	1	1	1	1	1	1	1	0	1	1	1	0	1	1	1	1	1	1	1	1
	UDP-N-acetylmuramoyl-L-alanineD-glutamate ligase	168	0.787879	K01925	1	1	1	0	1	1	1	1	1	1	1	1	1	1	1	1	0	1	1	1	1	1	1	0	0	1	0	1	0	0	1	1	1
Metabolism of Terpenoids and Polyketides	1-hydroxy-2-methyl-2-E-butenyl 4-diphosphate reductase 4Fe-4S protein	169	0.787879	K03527	1	1	0	0	0	1	0	1	1	1	1	1	1	0	1	1	1	1	1	0	1	1	1	1	0	1	1	1	1	1	1	1	1
	Transketolase	170	0.818182	K00615	1	1	1	0	1	1	1	1	1	1	1	1	1	1	1	1	1	1	0	0	1	1	0	1	1	1	0	1	0	1	1	1	1
	acetyl-CoA acyltransferase anaerobic	171	0	K00632	0	0	0	0	0	0	0	0	0	0	0	0	0	0	0	0	0	0	0	0	0	0	0	0	0	0	0	0	0	0	0	0	0
	geranyltranstransferase	172	0	K00795	0	0	0	0	0	0	0	0	0	0	0	0	0	0	0	0	0	0	0	0	0	0	0	0	0	0	0	0	0	0	0	0	0
	4-diphosphocytidyl-2C-methyl-D-erythritol synthase	173	0.69697	K00991	1	1	1	1	1	0	1	1	1	1	1	1	1	0	1	1	0	1	1	0	0	1	1	0	0	0	1	1	1	1	0	1	0
Nucleotide Metabolism	IMP dehydrogenase	174	0.727273	K00088	1	0	0	0	1	0	1	1	1	1	1	1	0	1	1	0	1	1	0	0	1	1	1	1	1	0	1	1	1	1	1	1	1
	anaerobic ribonucleoside-triphosphate reductase	175	0	K00527	0	0	0	0	0	0	0	0	0	0	0	0	0	0	0	0	0	0	0	0	0	0	0	0	0	0	0	0	0	0	0	0	0
	thioredoxin reductase FAD-NADP-binding	176	0.515152	K00384	1	0	1	0	0	0	1	1	0	0	0	0	1	1	1	1	0	0	1	0	0	1	0	0	1	0	0	1	1	1	1	1	1
	purine-nucleoside phosphorylase	177	0.363636	K03783	1	1	0	1	0	0	0	1	0	1	0	0	1	0	0	0	0	1	0	0	1	1	0	1	0	0	0	0	0	0	1	0	1
	uridine phosphorylase	178	0.272727	K00757	1	0	0	0	0	0	1	1	0	1	0	0	0	0	0	1	0	0	0	0	0	0	0	0	0	0	0	0	0	1	1	1	1
	thymidine phosphorylase	179	0	K00758	0	0	0	0	0	0	0	0	0	0	0	0	0	0	0	0	0	0	0	0	0	0	0	0	0	0	0	0	0	0	0	0	0
	cytidylate kinase	180	0	K13800	0	0	0	0	0	0	0	0	0	0	0	0	0	0	0	0	0	0	0	0	0	0	0	0	0	0	0	0	0	0	0	0	0
	cytosine deaminase	181	0	K01485	0	0	0	0	0	0	0	0	0	0	0	0	0	0	0	0	0	0	0	0	0	0	0	0	0	0	0	0	0	0	0	0	0
	ADP-ribose pyrophosphatase	182	0.454545	K01515	0	1	1	0	1	0	0	0	1	1	1	1	1	0	1	0	1	1	0	0	1	0	0	0	1	1	0	0	0	0	0	0	1
	orotidine-5-phosphate decarboxylase	183	0.727273	K01591	1	0	1	1	0	0	1	1	1	1	1	0	1	1	1	1	1	1	0	0	1	1	1	1	0	0	1	1	1	0	1	1	1
	phosphoribosylglycinamide synthetase phosphoribosylamine-glycine ligase	184	0.787879	K01945	1	0	1	1	0	0	1	1	1	1	1	1	1	0	1	0	1	1	1	0	1	1	1	1	1	0	1	1	1	1	1	1	1
	adenylosuccinate synthetase	185	0.787879	K01939	1	1	1	1	0	0	1	1	1	1	1	1	0	0	1	1	1	1	1	0	1	1	1	1	1	0	1	1	1	1	0	1	1
	carbamoyl phosphate synthetase small subunit glutamine amidotransferase	186	0.545455	K01955	0	0	1	0	1	0	0	1	1	1	1	0	0	1	1	0	0	1	0	0	1	1	1	1	0	0	1	1	1	0	0	1	1
Translation	L-Seryl-tRNASec selenium transferase	187	0.030303	K01042	0	0	0	0	0	0	0	0	0	0	0	0	0	0	0	1	0	0	0	0	0	0	0	0	0	0	0	0	0	0	0	0	0
	methionyl-tRNA synthetase	188	0.787879	K01874	1	0	1	1	1	1	1	1	0	1	1	1	1	0	1	1	1	1	0	0	0	1	0	1	1	1	1	1	1	1	1	1	1
	Serine-tRNA ligase	189	0.818182	K01875	1	0	1	1	1	1	1	1	1	1	1	1	1	0	1	1	1	1	0	1	0	1	0	1	1	1	0	1	1	1	1	1	1

## Sheet: CRC result
CRC (FengQ_2015 | SID31874)
Category	Protein name	Entry no.	KEGG KO ID	Genome summary	FengQ_2015__SID31874__bin.10	FengQ_2015__SID31874__bin.11	FengQ_2015__SID31874__bin.14	FengQ_2015__SID31874__bin.18	FengQ_2015__SID31874__bin.19	FengQ_2015__SID31874__bin.2	FengQ_2015__SID31874__bin.21	FengQ_2015__SID31874__bin.23	FengQ_2015__SID31874__bin.27	FengQ_2015__SID31874__bin.28	FengQ_2015__SID31874__bin.3	FengQ_2015__SID31874__bin.31	FengQ_2015__SID31874__bin.32	FengQ_2015__SID31874__bin.36	FengQ_2015__SID31874__bin.37	FengQ_2015__SID31874__bin.38	FengQ_2015__SID31874__bin.41	FengQ_2015__SID31874__bin.42	FengQ_2015__SID31874__bin.44	FengQ_2015__SID31874__bin.46	FengQ_2015__SID31874__bin.5	FengQ_2015__SID31874__bin.50	FengQ_2015__SID31874__bin.51	FengQ_2015__SID31874__bin.52	FengQ_2015__SID31874__bin.53	FengQ_2015__SID31874__bin.58	FengQ_2015__SID31874__bin.59	FengQ_2015__SID31874__bin.62	FengQ_2015__SID31874__bin.65	FengQ_2015__SID31874__bin.72	FengQ_2015__SID31874__bin.79	FengQ_2015__SID31874__bin.8	FengQ_2015__SID31874__bin.80	FengQ_2015__SID31874__bin.81	FengQ_2015__SID31874__bin.83	FengQ_2015__SID31874__bin.84	FengQ_2015__SID31874__bin.85	FengQ_2015__SID31874__bin.86
Amino Acid Metabolism	Histidinol dehydrogenase	1	K00013	0.5	0	0	0	1	0	0	0	0	0	1	0	0	1	0	0	1	0	1	1	1	0	0	1	1	1	1	0	1	0	1	0	1	1	1	0	1	1	1
	homoserine dehydrogenase	2	K00003	0.657895	0	0	0	1	1	0	0	1	0	1	1	0	1	1	1	1	1	1	1	1	1	1	1	1	0	1	1	0	0	1	0	1	1	0	0	1	1	1
	3-isopropylmalate dehydrogenase	3	K00052	0.5	0	0	0	1	0	0	0	0	0	1	0	0	1	0	0	1	1	1	1	0	0	0	1	1	1	1	0	1	1	1	0	0	1	1	0	1	1	1
	ketol-acid reductoisomerase	4	K00053	0.447368	0	0	0	1	0	0	0	0	0	1	0	0	1	0	0	1	0	1	1	0	0	0	1	1	1	1	0	0	1	1	0	1	1	1	0	1	0	1
	prephenate dehydrogenase	5	K00220	0	0	0	0	0	0	0	0	0	0	0	0	0	0	0	0	0	0	0	0	0	0	0	0	0	0	0	0	0	0	0	0	0	0	0	0	0	0	0
	dihydrodipicolinate reductase	6	K00215	0.789474	1	0	0	1	1	1	0	0	1	1	0	1	1	1	1	1	0	1	1	1	1	0	1	1	1	1	1	0	1	1	1	1	1	1	1	1	1	1
	L-alanine dehydrogenase	7	K00259	0.131579	0	0	0	0	0	1	0	0	0	0	0	1	0	0	0	0	0	0	0	1	0	0	0	0	0	0	0	0	1	0	0	0	0	1	0	0	0	0
	glutamate synthase large and small subunit (NADPH)	8	K00265	0.315789	0	0	0	1	0	0	0	0	0	0	0	0	1	0	0	0	0	1	0	0	1	0	1	1	1	1	0	0	1	1	0	1	1	0	0	0	0	0
	pyrroline-5-carboxylate reductase	9	K00286	0.736842	0	0	0	1	0	1	0	1	1	1	1	1	1	1	1	1	1	1	1	1	1	0	1	0	1	1	1	1	1	1	0	1	1	1	0	1	1	0
	proline dehydrogenase	10	K00318	0.0263158	0	0	0	0	0	0	0	0	0	0	0	0	0	0	0	0	0	0	0	0	0	0	0	0	0	0	0	0	1	0	0	0	0	0	0	0	0	0
	serine hydroxymethyltransferase	11	K00600	0.815789	1	1	1	1	1	1	0	1	1	1	0	1	1	1	0	1	1	1	1	1	1	0	1	1	1	1	1	0	1	1	1	0	1	1	1	1	1	0
	ornithine carbamoyltransferase 1	12	K00611	0.526316	0	1	0	1	0	0	0	0	0	1	0	0	1	1	1	1	1	0	1	1	1	0	1	0	0	1	1	1	0	1	0	1	1	0	0	1	1	0
	acetyl-CoA acyltransferase anaerobic	13	K00619	0.0263158	0	0	0	0	0	0	0	0	0	0	0	0	0	0	1	0	0	0	0	0	0	0	0	0	0	0	0	0	0	0	0	0	0	0	0	0	0	0
	acetyl-CoA acyltransferase anaerobic	14	K00619	0.0263158	0	0	0	0	0	0	0	0	0	0	0	0	0	0	1	0	0	0	0	0	0	0	0	0	0	0	0	0	0	0	0	0	0	0	0	0	0	0
	serine O-acetyltransferase	15	K00640	0.736842	0	0	1	1	0	0	0	1	0	1	1	1	1	1	0	1	1	1	1	1	1	0	1	1	1	1	1	1	1	1	0	1	1	1	1	1	1	0
	2-isopropylmalate synthase	16	K01649	0.526316	0	0	0	1	0	0	0	0	0	1	0	0	1	1	0	1	1	1	1	0	0	0	1	1	0	1	1	1	1	1	0	1	1	1	0	1	1	0
	ATP phosphoribosyltransferase	17	K00765	0.473684	0	0	0	1	0	0	0	0	0	1	0	0	1	0	0	1	0	0	1	1	1	1	1	1	1	1	0	0	0	1	0	1	1	1	0	1	1	0
	Spermidine Synthase	18	K00797	0.236842	0	0	0	1	0	0	0	0	0	1	0	0	0	0	1	1	0	0	1	0	1	0	1	0	0	0	0	0	0	1	0	0	1	0	0	0	0	0
	cysteine synthase A	19	K01738	0.657895	0	0	0	1	0	0	0	1	0	1	0	1	1	1	1	1	1	1	1	0	1	1	1	1	1	1	1	1	1	1	0	0	1	1	0	1	1	0
	cystathionine gamma-synthase	20	K01739	0	0	0	0	0	0	0	0	0	0	0	0	0	0	0	0	0	0	0	0	0	0	0	0	0	0	0	0	0	0	0	0	0	0	0	0	0	0	0
	3-deoxy-7-phosphoheptulonate synthase	21	K01626	0.368421	0	0	0	1	0	0	0	0	0	1	1	0	0	0	1	0	0	0	1	1	0	1	0	1	0	1	0	0	0	1	0	1	1	0	0	0	1	1
	branched-chain-amino-acid transaminase	22	K00826	0.684211	1	0	0	1	1	1	0	0	0	0	1	0	1	1	0	1	1	1	1	0	0	0	1	1	1	1	1	1	1	1	1	1	1	1	1	1	1	0
	valine-pyruvate aminotransferase	23	K00835	0	0	0	0	0	0	0	0	0	0	0	0	0	0	0	0	0	0	0	0	0	0	0	0	0	0	0	0	0	0	0	0	0	0	0	0	0	0	0
	homoserine kinase	24	K00872	0.684211	0	0	0	1	0	1	1	0	1	1	1	0	1	0	1	1	1	1	1	1	1	1	1	1	0	1	1	1	0	1	0	1	1	0	0	1	1	1
	shikimate kinase I II	25	K00891	0.815789	1	0	0	1	1	1	0	1	1	1	1	1	1	1	0	1	1	0	1	1	1	0	1	1	1	1	1	1	1	1	1	1	1	1	1	1	1	0
	gamma-glutamyl kinase	26	K00931	0.657895	0	0	0	1	0	0	0	1	0	1	1	1	1	1	0	1	1	0	1	1	1	0	1	1	1	1	1	1	1	1	0	1	1	1	0	0	1	1
	aspartate kinase	27	K00928	0.342105	0	0	0	0	0	0	0	0	0	0	0	1	1	1	1	0	0	1	0	0	1	0	1	1	1	0	0	1	0	0	1	0	1	0	0	0	1	0
	acetylglutamate kinase	28	K00930	0.631579	0	0	0	1	0	0	0	0	1	1	1	1	1	1	1	1	1	0	1	0	0	0	1	1	1	1	1	1	1	1	0	1	1	1	0	1	1	0
	Butyryl CoA Acetate CoA Transferase	29	K01027	0	0	0	0	0	0	0	0	0	0	0	0	0	0	0	0	0	0	0	0	0	0	0	0	0	0	0	0	0	0	0	0	0	0	0	0	0	0	0
	L-glutaminase	30	K01425	0.184211	0	0	0	0	0	1	1	0	1	0	0	1	0	0	0	0	0	0	0	0	0	0	0	0	1	0	0	0	1	0	0	0	0	1	0	0	0	0
	Agamintase	31	K01480	0.184211	0	0	1	0	0	1	0	0	1	0	0	0	0	0	0	1	0	0	0	1	1	0	0	0	0	0	0	0	0	0	0	0	1	0	0	0	0	0
	cytosine deaminase	32	K01485	0	0	0	0	0	0	0	0	0	0	0	0	0	0	0	0	0	0	0	0	0	0	0	0	0	0	0	0	0	0	0	0	0	0	0	0	0	0	0
	phosphoribosyl-AMP cyclohydrolase	33	K01496	0.157895	0	0	0	0	0	0	0	0	0	1	0	0	0	1	0	0	0	0	0	0	0	0	0	1	0	1	0	0	0	0	0	1	0	0	0	1	0	0
	phosphoribosyl-ATP pyrophosphatase	34	K01523	0.0526316	0	0	0	0	0	0	0	0	0	0	0	0	0	0	0	0	0	0	0	0	0	0	1	0	0	0	0	0	0	0	0	1	0	0	0	0	0	0
	glutamate decarboxylase A and B PLP-dependent	35	K01580	0.157895	0	0	0	0	0	1	0	0	0	0	0	1	0	0	0	0	0	0	0	0	0	0	0	0	1	0	0	0	1	0	0	0	0	1	0	0	0	1
	Ornithine Decarboxylase	36	K01581	0	0	0	0	0	0	0	0	0	0	0	0	0	0	0	0	0	0	0	0	0	0	0	0	0	0	0	0	0	0	0	0	0	0	0	0	0	0	0
	lysine decarboxylase 1	37	K01582	0	0	0	0	0	0	0	0	0	0	0	0	0	0	0	0	0	0	0	0	0	0	0	0	0	0	0	0	0	0	0	0	0	0	0	0	0	0	0
	biosynthetic arginine decarboxylase PLP-binding	38	K01583	0	0	0	0	0	0	0	0	0	0	0	0	0	0	0	0	0	0	0	0	0	0	0	0	0	0	0	0	0	0	0	0	0	0	0	0	0	0	0
	Indole-3-glycerol-phosphate synthase	39	K01609	0.263158	0	0	0	0	0	0	0	0	0	0	0	0	0	1	1	1	1	0	1	0	0	0	1	0	0	1	0	0	0	1	0	1	0	0	0	0	1	0
	KDPG Aldolase	40	K01625	0.394737	0	0	0	0	1	0	0	0	1	1	1	0	1	1	0	0	0	0	0	0	0	1	0	0	0	1	1	0	1	1	1	0	1	0	0	1	1	0
	L-threonine aldolase	41	K01620	0.368421	0	0	0	1	0	0	1	1	0	0	1	0	1	0	0	0	1	0	0	0	1	1	0	0	1	0	0	0	1	1	0	1	1	0	0	1	0	0
	anthranilate synthase	42	K01657	0.263158	0	0	0	1	0	0	0	0	0	1	0	0	0	0	0	0	1	0	1	0	0	0	1	0	0	1	0	0	1	1	0	1	0	0	0	0	1	0
	3-dehydroquinate dehydratase	43	K03785	0.157895	0	0	0	1	0	0	0	0	0	0	0	0	1	0	0	0	0	0	0	0	0	1	0	0	0	1	0	0	0	1	0	1	0	0	0	0	0	0
	dihydrodipicolinate synthase	44	K01714	0.789474	1	0	0	1	0	1	0	0	0	1	1	1	1	1	1	1	1	1	1	1	1	0	1	1	1	1	1	0	1	1	1	1	1	1	1	1	1	1
	dihydroxy-acid dehydratase	45	K01687	0.526316	0	0	0	1	0	0	0	0	0	0	0	0	1	0	1	1	0	1	1	0	1	0	1	1	1	1	0	1	1	1	0	1	1	1	0	1	1	1
	L-threonine synthase	46	K01733	0.710526	0	0	0	1	1	0	0	1	0	1	0	1	1	1	0	1	1	1	1	1	1	1	1	1	1	1	1	1	1	1	0	1	1	1	0	1	1	0
	chorismate synthase	47	K01736	0.763158	1	0	0	1	1	1	0	1	1	1	0	0	1	1	0	0	1	0	1	1	1	1	1	1	1	1	1	1	1	1	1	1	1	1	1	1	1	0
	threonine ammonia-lyase	48	K01754	0.578947	0	0	0	1	1	0	1	0	0	1	0	0	1	1	1	1	0	1	1	1	1	0	0	1	0	1	0	1	1	1	0	1	1	0	0	1	1	1
	argininosuccinate lyase	49	K01755	0.605263	0	0	0	1	0	0	1	0	1	1	1	1	1	1	1	1	0	0	1	0	1	0	1	1	0	1	1	0	1	1	0	1	1	1	0	1	1	0
	D-cysteine desulfhydrase	50	K05396	0.0263158	0	0	0	0	0	0	0	1	0	0	0	0	0	0	0	0	0	0	0	0	0	0	0	0	0	0	0	0	0	0	0	0	0	0	0	0	0	0
	aspartate racemase	51	K01779	0.157895	0	0	0	0	0	0	0	0	0	0	1	0	0	1	1	0	1	0	0	0	0	0	0	0	0	0	0	0	0	0	0	0	1	0	0	0	0	1
	Diaminopimelate epimerase	52	K01778	0.605263	0	0	1	1	1	1	0	1	1	1	0	0	0	1	0	1	0	1	0	1	1	0	0	1	1	1	1	0	1	1	0	1	1	1	0	1	1	0
	chorismate mutase	53	K01850	0	0	0	0	0	0	0	0	0	0	0	0	0	0	0	0	0	0	0	0	0	0	0	0	0	0	0	0	0	0	0	0	0	0	0	0	0	0	0
	aspartate-ammonia ligase	54	K01914	0.447368	0	0	1	1	0	0	0	1	0	0	0	0	1	0	0	0	1	0	0	1	1	1	0	0	1	1	1	0	1	1	0	1	1	1	0	1	0	0
	L-glutamine synthase	55	K01915	0.894737	0	0	1	1	1	1	1	1	1	1	1	1	1	1	1	1	1	1	1	1	1	1	1	1	1	1	1	0	1	1	1	1	1	1	0	1	1	1
	UDP-N-acetylmuramoyl-L-alanyl-D-glutamatemeso-diaminopimelate ligase	56	K01928	0.921053	1	1	0	1	1	1	1	1	1	1	1	1	1	1	1	1	1	0	1	1	1	0	1	1	1	1	1	1	1	1	1	1	1	1	1	1	1	1
	adenylosuccinate synthetase	57	K01939	0.815789	1	0	1	1	1	1	1	0	1	1	1	0	1	1	0	1	1	1	1	1	1	0	0	1	1	1	1	0	1	1	1	1	1	1	1	1	1	1
	arginosuccinate synthase	58	K01940	0.631579	0	0	0	1	0	0	1	0	0	1	0	1	1	1	1	1	0	0	1	1	1	0	1	1	1	1	1	1	1	1	0	1	1	1	0	1	1	0
	carbamoyl phosphate synthetase small subunit glutamine amidotransferase	59	K01955	0.631579	1	0	0	1	1	1	0	0	1	0	0	0	1	0	1	0	0	1	1	0	1	0	0	1	1	1	1	1	0	1	1	1	1	1	1	1	1	1
Carbohydrate Metabolism	L-Lactate Dehydrogenase	60	K00016	0.210526	0	0	0	1	0	0	0	0	0	1	0	0	0	1	0	0	0	0	0	0	0	1	0	0	0	1	0	0	0	1	0	1	0	0	0	0	1	0
	L-Lactate Dehydrogenase (cytochrome)	61	K00101	0	0	0	0	0	0	0	0	0	0	0	0	0	0	0	0	0	0	0	0	0	0	0	0	0	0	0	0	0	0	0	0	0	0	0	0	0	0	0
	serine hydroxymethyltransferase	62	K00600	0.815789	1	1	1	1	1	1	0	1	1	1	0	1	1	1	0	1	1	1	1	1	1	0	1	1	1	1	1	0	1	1	1	0	1	1	1	1	1	0
	Transketolase	63	K00615	0.842105	1	1	1	1	1	1	1	0	0	1	1	0	1	1	0	1	1	0	1	1	1	1	1	1	1	1	1	1	1	1	1	1	1	1	1	1	1	0
	Transaldolase	64	K00616	0.447368	1	0	1	1	0	1	0	0	0	1	0	0	1	1	1	0	0	0	1	0	1	0	0	0	1	1	0	0	1	1	0	1	1	0	1	0	0	0
	Pyruvate-Formate Lyase	65	K00656	0.473684	0	0	1	1	0	0	0	0	1	0	0	1	1	0	0	0	0	1	1	1	1	1	0	1	0	1	0	0	1	1	0	1	1	0	0	1	1	0
	Si-Citrate Synthase	66	K01647	0.0263158	0	0	0	0	0	0	0	0	0	0	0	0	0	0	0	0	0	0	0	0	0	0	0	0	0	0	0	0	0	0	0	0	0	0	0	0	0	1
	2-isopropylmalate synthase	67	K01649	0.526316	0	0	0	1	0	0	0	0	0	1	0	0	1	1	0	1	1	1	1	0	0	0	1	1	0	1	1	1	1	1	0	1	1	1	0	1	1	0
	Glycogen Synthase	68	K00703	0.473684	0	0	1	1	0	0	1	0	0	1	0	0	0	1	0	1	1	0	1	0	1	1	0	1	0	1	1	1	0	1	0	0	1	0	0	1	1	0
	Gluconokinase	69	K00851	0.0263158	0	0	0	0	0	0	0	0	0	0	0	0	0	0	0	0	0	0	0	0	0	0	0	0	0	0	0	0	0	0	0	0	0	0	0	0	0	1
	Ribokinase	70	K00852	0.210526	0	0	1	0	1	0	0	0	0	0	1	1	0	0	1	0	0	0	0	0	0	0	0	0	0	0	0	0	1	0	0	1	0	0	0	1	0	0
	1-Phosphofructokinase	71	K00882	0.236842	0	0	0	1	0	0	0	0	0	0	0	0	1	0	0	0	0	1	1	0	1	0	0	1	0	1	0	0	0	0	0	0	1	0	0	1	0	0
	Galactokinase	72	K00849	0.263158	0	0	0	1	0	0	1	0	0	0	0	0	0	1	0	0	0	0	0	0	0	0	0	0	1	1	0	0	1	1	0	1	0	1	0	0	0	1
	Propionate Kinase	73	K00932	0	0	0	0	0	0	0	0	0	0	0	0	0	0	0	0	0	0	0	0	0	0	0	0	0	0	0	0	0	0	0	0	0	0	0	0	0	0	0
	Butyrate Kinase	74	K00929	0.236842	0	0	0	0	1	1	0	1	1	0	0	0	1	0	0	0	0	0	0	0	0	0	0	1	1	0	0	0	0	0	1	1	0	0	0	0	0	0
	Butyryl CoA Acetate CoA Transferase	75	K01027	0	0	0	0	0	0	0	0	0	0	0	0	0	0	0	0	0	0	0	0	0	0	0	0	0	0	0	0	0	0	0	0	0	0	0	0	0	0	0
	Pectinase (Pectinesterase)	76	K01184	0	0	0	0	0	0	0	0	0	0	0	0	0	0	0	0	0	0	0	0	0	0	0	0	0	0	0	0	0	0	0	0	0	0	0	0	0	0	0
	alpha-Glucosidase	77	K01187	0.236842	0	0	0	1	0	0	0	0	0	0	0	0	0	0	0	0	0	1	0	0	0	0	0	0	1	0	0	0	0	1	0	1	1	1	0	1	0	1
	beta-D-galactosidase	78	K01190	0.578947	0	0	0	1	1	0	0	0	1	0	0	1	1	1	0	1	0	0	1	0	1	1	0	1	1	1	1	0	1	1	0	1	1	1	0	1	1	1
	beta-D-glucuronidase	79	K01195	0.105263	0	0	0	0	0	0	0	0	0	0	0	0	1	0	0	0	0	0	0	0	0	0	0	0	1	0	0	0	0	0	0	0	1	0	0	1	0	0
	beta-N-acetyl-D-hexosaminide N-acetylhexosaminohydrolase	80	K01207	0.421053	1	0	0	1	0	0	0	0	0	0	0	1	1	1	0	0	1	0	1	0	0	0	1	0	1	1	0	0	1	1	0	1	1	1	1	0	0	0
	Extracellular Exopectate Hydrolase	81	K22933	0.0263158	0	0	0	0	0	0	0	0	0	0	0	0	0	0	0	0	0	0	0	0	0	0	0	0	0	0	0	0	0	0	0	0	1	0	0	0	0	0
	Cellulase (Exoglucanase)	82	K19668	0	0	0	0	0	0	0	0	0	0	0	0	0	0	0	0	0	0	0	0	0	0	0	0	0	0	0	0	0	0	0	0	0	0	0	0	0	0	0
	N-Acetylglucosamine-6-Phosphate Deacetylase	83	K01443	0.421053	0	0	1	1	0	0	1	0	1	0	1	1	1	0	0	0	0	0	0	0	1	1	0	0	0	0	1	0	1	1	0	0	1	0	0	1	1	1
	glutamate decarboxylase A and B PLP-dependent	84	K01580	0.157895	0	0	0	0	0	1	0	0	0	0	0	1	0	0	0	0	0	0	0	0	0	0	0	0	1	0	0	0	1	0	0	0	0	1	0	0	0	1
	Methylmalonyl-CaA decarboxylase	85	K01604	0.157895	1	0	0	0	0	1	0	0	0	0	0	1	0	0	0	0	0	0	0	0	0	0	0	0	0	0	0	0	1	0	0	0	0	1	1	0	0	0
	KDPG Aldolase	86	K01625	0.394737	0	0	0	0	1	0	0	0	1	1	1	0	1	1	0	0	0	0	0	0	0	1	0	0	0	1	1	0	1	1	1	0	1	0	0	1	1	0
	Phosphogluconate dehydratase	87	K01690	0	0	0	0	0	0	0	0	0	0	0	0	0	0	0	0	0	0	0	0	0	0	0	0	0	0	0	0	0	0	0	0	0	0	0	0	0	0	0
	Extracellular Endopectate Lyase	88	K01728	0	0	0	0	0	0	0	0	0	0	0	0	0	0	0	0	0	0	0	0	0	0	0	0	0	0	0	0	0	0	0	0	0	0	0	0	0	0	0
	Glucuronate Isomerase	89	K01812	0.368421	0	0	0	0	1	0	0	0	0	0	1	1	1	0	0	0	0	0	0	0	1	1	0	0	1	1	1	0	1	0	0	1	1	0	0	1	1	0
	Fucose Isomerase	90	K01818	0.184211	0	0	0	0	0	0	0	0	0	0	0	1	0	1	0	0	0	0	1	0	0	0	0	0	1	0	1	0	0	0	0	0	1	0	0	0	1	0
	Arabinose Isomerase	91	K01804	0.236842	0	0	0	1	1	0	0	0	0	0	0	0	1	0	0	0	0	0	1	0	0	0	0	0	1	0	0	0	0	0	0	1	1	0	0	0	1	1
	Xylose Isomerase	92	K01805	0.157895	0	0	0	0	0	0	0	0	0	0	0	1	0	0	0	1	0	0	0	0	0	0	0	0	1	0	1	0	1	0	0	0	0	0	0	0	0	1
	Mannose-6-Phosphate Isomerase	93	K01809	0.605263	1	0	0	1	1	1	0	1	1	1	1	0	1	0	0	1	1	0	1	0	1	1	0	0	1	0	1	0	1	0	1	0	1	1	1	1	1	0
	L-glutamine synthase	94	K01915	0.894737	0	0	1	1	1	1	1	1	1	1	1	1	1	1	1	1	1	1	1	1	1	1	1	1	1	1	1	0	1	1	1	1	1	1	0	1	1	1
Energy Metabolism	Carbon Monoxide Dehydrogenase	95	K00198	0	0	0	0	0	0	0	0	0	0	0	0	0	0	0	0	0	0	0	0	0	0	0	0	0	0	0	0	0	0	0	0	0	0	0	0	0	0	0
	glutamate synthase large and small subunit (NADPH)	96	K00265	0.315789	0	0	0	1	0	0	0	0	0	0	0	0	1	0	0	0	0	1	0	0	1	0	1	1	1	1	0	0	1	1	0	1	1	0	0	0	0	0
	serine hydroxymethyltransferase	97	K00600	0.815789	1	1	1	1	1	1	0	1	1	1	0	1	1	1	0	1	1	1	1	1	1	0	1	1	1	1	1	0	1	1	1	0	1	1	1	1	1	0
	Transketolase	98	K00615	0.842105	1	1	1	1	1	1	1	0	0	1	1	0	1	1	0	1	1	0	1	1	1	1	1	1	1	1	1	1	1	1	1	1	1	1	1	1	1	0
	serine O-acetyltransferase	99	K00640	0.736842	0	0	1	1	0	0	0	1	0	1	1	1	1	1	0	1	1	1	1	1	1	0	1	1	1	1	1	1	1	1	0	1	1	1	1	1	1	0
	cysteine synthase A	100	K01738	0.657895	0	0	0	1	0	0	0	1	0	1	0	1	1	1	1	1	1	1	1	0	1	1	1	1	1	1	1	1	1	1	0	0	1	1	0	1	1	0
	cystathionine gamma-synthase	101	K01739	0	0	0	0	0	0	0	0	0	0	0	0	0	0	0	0	0	0	0	0	0	0	0	0	0	0	0	0	0	0	0	0	0	0	0	0	0	0	0
	Acetate Kinase	102	K00925	0.842105	1	1	1	1	0	1	1	0	1	1	1	1	1	1	1	1	1	1	1	1	0	0	1	1	1	1	1	0	1	1	1	1	1	1	1	1	1	0
	sulfate adenylyltransferase subunit 2	103	K00957	0.210526	0	0	0	1	0	0	0	0	0	1	0	1	0	0	0	0	0	1	0	0	0	0	0	0	1	1	0	0	1	1	0	0	0	0	0	0	0	0
	asparaginase	104	K01424	0.631579	1	0	0	0	1	1	0	1	0	1	1	1	1	0	0	1	1	0	1	1	0	1	1	0	1	0	0	0	1	0	1	1	1	1	1	1	1	1
	L-glutaminase	105	K01425	0.184211	0	0	0	0	0	1	1	0	1	0	0	1	0	0	0	0	0	0	0	0	0	0	0	0	1	0	0	0	1	0	0	0	0	1	0	0	0	0
	aspartate-ammonia ligase	106	K01914	0.447368	0	0	1	1	0	0	0	1	0	0	0	0	1	0	0	0	1	0	0	1	1	1	0	0	1	1	1	0	1	1	0	1	1	1	0	1	0	0
	L-glutamine synthase	107	K01915	0.894737	0	0	1	1	1	1	1	1	1	1	1	1	1	1	1	1	1	1	1	1	1	1	1	1	1	1	1	0	1	1	1	1	1	1	0	1	1	1
	Formyltetrahydrofolate synthetase	108	K00288	0	0	0	0	0	0	0	0	0	0	0	0	0	0	0	0	0	0	0	0	0	0	0	0	0	0	0	0	0	0	0	0	0	0	0	0	0	0	0
Glycan Biosynthesis and Metabolism	UDP-N-acetylglucosamine acyltransferase	109	K00677	0.289474	1	0	0	0	1	1	1	0	0	0	0	1	0	0	1	0	0	0	0	0	0	0	0	0	1	0	0	0	1	0	1	0	0	1	1	0	0	0
	phospho-N-acetylmuramoyl-pentapeptide transferase	110	K01000	0.763158	1	1	1	0	1	1	1	1	1	0	0	1	1	0	1	0	1	0	1	1	0	1	1	1	1	1	1	1	1	0	1	0	1	1	1	1	1	1
	N-acetyl-D-galactosamine-4-sulfate 4-sulfohydrolase	111	K01135	0	0	0	0	0	0	0	0	0	0	0	0	0	0	0	0	0	0	0	0	0	0	0	0	0	0	0	0	0	0	0	0	0	0	0	0	0	0	0
	N-acetyl-D-glucosamine-6-sulfate 6-sulfohydrolase	112	K01137	0	0	0	0	0	0	0	0	0	0	0	0	0	0	0	0	0	0	0	0	0	0	0	0	0	0	0	0	0	0	0	0	0	0	0	0	0	0	0
	beta-D-galactosidase	113	K01190	0.578947	0	0	0	1	1	0	0	0	1	0	0	1	1	1	0	1	0	0	1	0	1	1	0	1	1	1	1	0	1	1	0	1	1	1	0	1	1	1
	alpha-mannosidase	114	K01191	0.131579	0	0	0	0	0	0	0	0	0	0	0	1	0	0	0	0	0	0	0	0	0	0	0	0	1	0	1	0	0	0	0	1	0	0	0	0	1	0
	Mannanase (beta-mannosidase)	115	K01192	0.210526	0	0	0	0	0	0	0	0	1	0	0	1	0	0	0	1	0	0	0	0	0	0	0	0	1	0	0	0	0	0	0	1	0	1	0	1	1	0
	beta-D-glucuronidase	116	K01195	0.105263	0	0	0	0	0	0	0	0	0	0	0	0	1	0	0	0	0	0	0	0	0	0	0	0	1	0	0	0	0	0	0	0	1	0	0	1	0	0
	beta-N-acetyl-D-hexosaminide N-acetylhexosaminohydrolase	117	K01207	0.421053	1	0	0	1	0	0	0	0	0	0	0	1	1	1	0	0	1	0	1	0	0	0	1	0	1	1	0	0	1	1	0	1	1	1	1	0	0	0
	ADP-L-glycero-D-mannoheptose-6-epimerase NAD(P)-binding	118	K03274	0.0263158	0	0	0	0	0	0	1	0	0	0	0	0	0	0	0	0	0	0	0	0	0	0	0	0	0	0	0	0	0	0	0	0	0	0	0	0	0	0
	UDP-N-acetylmuramoyl-L-alanyl-D-glutamatemeso-diaminopimelate ligase	119	K01928	0.921053	1	1	0	1	1	1	1	1	1	1	1	1	1	1	1	1	1	0	1	1	1	0	1	1	1	1	1	1	1	1	1	1	1	1	1	1	1	1
	D-alanineD-alanine ligase	120	K01921	0.921053	1	0	1	1	1	1	1	1	1	1	1	1	1	1	1	1	1	0	1	1	1	1	1	0	1	1	1	1	1	1	1	1	1	1	1	1	1	1
	UDP-N-acetylmuramateL-alanine ligase	121	K01924	0.789474	1	1	0	1	1	1	1	1	1	1	0	1	1	1	1	1	0	1	1	1	0	0	0	0	1	1	1	0	1	1	1	1	1	1	1	1	1	1
	UDP-N-acetylmuramoyl-L-alanineD-glutamate ligase	122	K01925	0.815789	1	1	0	1	1	1	1	1	1	1	0	1	0	0	1	1	1	1	0	1	1	1	1	1	1	1	1	0	1	1	1	1	1	1	1	1	0	1
Lipid Metabolism	acetyl-CoA acyltransferase anaerobic	123	K00632	0	0	0	0	0	0	0	0	0	0	0	0	0	0	0	0	0	0	0	0	0	0	0	0	0	0	0	0	0	0	0	0	0	0	0	0	0	0	0
	beta-ketoacyl-acyl-carrier-protein synthase III	124	K00648	0.605263	1	0	0	1	0	1	1	0	1	1	1	0	1	1	1	1	0	0	1	0	1	0	0	0	1	1	0	1	1	1	1	1	1	1	1	0	0	0
	Glycerol Kinase	125	K00864	0.447368	0	0	1	1	0	0	0	1	0	1	0	0	1	0	0	1	1	0	0	1	1	0	0	1	1	1	1	0	1	0	0	1	1	0	0	0	1	0
	Butyryl CoA Acetate CoA Transferase	126	K01027	0	0	0	0	0	0	0	0	0	0	0	0	0	0	0	0	0	0	0	0	0	0	0	0	0	0	0	0	0	0	0	0	0	0	0	0	0	0	0
	beta-D-galactosidase	127	K01190	0.578947	0	0	0	1	1	0	0	0	1	0	0	1	1	1	0	1	0	0	1	0	1	1	0	1	1	1	1	0	1	1	0	1	1	1	0	1	1	1
	Conjugated Bile Salt Hydrolase	128	K01442	0.736842	0	0	1	1	1	1	0	1	1	1	1	1	1	1	1	1	0	1	1	1	0	1	1	0	1	0	1	1	1	1	0	1	1	1	0	1	1	0
Metabolism of Cofactors and Vitamins	ketol-acid reductoisomerase	129	K00053	0.447368	0	0	0	1	0	0	0	0	0	1	0	0	1	0	0	1	0	1	1	0	0	0	1	1	1	1	0	0	1	1	0	1	1	1	0	1	0	1
	3-demethylubiquinone-9 3-methyltransferase	130	K00568	0	0	0	0	0	0	0	0	0	0	0	0	0	0	0	0	0	0	0	0	0	0	0	0	0	0	0	0	0	0	0	0	0	0	0	0	0	0	0
	Riboflavin Synthase ?? Subunit	131	K00793	0.421053	1	0	0	1	1	1	1	0	1	0	0	1	0	1	0	0	0	0	0	0	0	0	0	1	1	1	0	1	1	0	1	0	0	1	1	0	0	0
	branched-chain-amino-acid transaminase	132	K00826	0.684211	1	0	0	1	1	1	0	0	0	0	1	0	1	1	0	1	1	1	1	0	0	0	1	1	1	1	1	1	1	1	1	1	1	1	1	1	1	0
	Pyridoxal Kinase	133	K00868	0.447368	0	0	0	1	0	0	1	1	0	1	1	0	0	0	0	1	0	0	1	0	0	0	1	1	1	0	1	0	1	0	0	1	1	0	0	1	1	1
	Thiamin Kinase	134	K07251	0	0	0	0	0	0	0	0	0	0	0	0	0	0	0	0	0	0	0	0	0	0	0	0	0	0	0	0	0	0	0	0	0	0	0	0	0	0	0
	Cobalamin Synthase	135	K02233	0.421053	1	0	0	1	0	0	1	1	0	1	0	1	1	0	0	0	1	0	0	1	0	0	0	0	1	0	0	0	1	1	0	1	1	0	1	1	0	0
	Biotin Synthase	136	K01012	0.473684	1	0	0	1	1	0	1	0	0	0	0	0	0	1	1	1	0	1	1	0	0	1	1	1	1	1	0	0	1	1	0	0	0	1	1	0	0	0
	beta-D-glucuronidase	137	K01195	0.105263	0	0	0	0	0	0	0	0	0	0	0	0	1	0	0	0	0	0	0	0	0	0	0	0	1	0	0	0	0	0	0	0	1	0	0	1	0	0
	dihydroxy-acid dehydratase	138	K01687	0.526316	0	0	0	1	0	0	0	0	0	0	0	0	1	0	1	1	0	1	1	0	1	0	1	1	1	1	0	1	1	1	0	1	1	1	0	1	1	1
	L-threonine synthase	139	K01733	0.710526	0	0	0	1	1	0	0	1	0	1	0	1	1	1	0	1	1	1	1	1	1	1	1	1	1	1	1	1	1	1	0	1	1	1	0	1	1	0
	Ferrochetalase	140	K01772	0.0526316	1	0	0	0	0	0	0	0	0	0	0	0	0	0	0	0	0	0	0	0	0	0	0	0	0	0	0	0	0	0	0	0	0	0	1	0	0	0
	Cobalt Chelatase	141	K02190	0.315789	1	0	0	1	0	0	1	0	0	0	0	0	1	0	0	0	1	0	0	0	1	0	0	0	1	0	0	0	1	1	0	1	1	0	1	0	0	0
	Pantothenate Synthetase	142	K01918	0.473684	1	0	0	1	1	1	1	0	1	0	0	1	0	1	0	0	0	0	0	0	0	0	1	1	1	1	0	1	1	1	1	0	0	1	1	0	0	0
	Folylpolyglutamate Synthase	143	K11754	0.763158	1	0	0	1	1	1	1	1	1	1	0	1	1	0	0	0	1	0	1	0	1	1	1	1	1	1	1	1	1	1	1	1	1	1	1	1	0	1
	Formyltetrahydrofolate synthetase	144	K00288	0	0	0	0	0	0	0	0	0	0	0	0	0	0	0	0	0	0	0	0	0	0	0	0	0	0	0	0	0	0	0	0	0	0	0	0	0	0	0
	Quinolinate Synthase	145	K03517	0.552632	1	0	0	1	0	1	0	0	1	1	1	1	0	1	0	1	0	0	1	0	0	1	0	1	1	1	0	1	1	1	1	0	0	1	1	0	1	0
Metabolism of Other Amino Acids	L-alanine dehydrogenase	146	K00259	0.131579	0	0	0	0	0	1	0	0	0	0	0	1	0	0	0	0	0	0	0	1	0	0	0	0	0	0	0	0	1	0	0	0	0	1	0	0	0	0
	thioredoxin reductase FAD-NADP-binding	147	K00384	0.578947	1	0	0	1	1	1	0	1	1	1	0	1	0	0	1	1	0	1	0	1	0	0	1	0	1	1	1	0	1	0	1	1	0	1	1	0	0	1
	serine hydroxymethyltransferase	148	K00600	0.815789	1	1	1	1	1	1	0	1	1	1	0	1	1	1	0	1	1	1	1	1	1	0	1	1	1	1	1	0	1	1	1	0	1	1	1	1	1	0
	Spermidine Synthase	149	K00797	0.236842	0	0	0	1	0	0	0	0	0	1	0	0	0	0	1	1	0	0	1	0	1	0	1	0	0	0	0	0	0	1	0	0	1	0	0	0	0	0
	cystathionine gamma-synthase	150	K01739	0	0	0	0	0	0	0	0	0	0	0	0	0	0	0	0	0	0	0	0	0	0	0	0	0	0	0	0	0	0	0	0	0	0	0	0	0	0	0
	Acetate Kinase	151	K00925	0.842105	1	1	1	1	0	1	1	0	1	1	1	1	1	1	1	1	1	1	1	1	0	0	1	1	1	1	1	0	1	1	1	1	1	1	1	1	1	0
	sulfate adenylyltransferase subunit 2	152	K00955	0.263158	0	0	0	1	0	0	0	0	0	1	0	1	0	1	0	0	0	1	0	0	0	0	1	0	1	1	0	0	1	1	0	0	0	0	0	0	0	0
	L-Seryl-tRNASec selenium transferase	153	K01042	0.105263	0	0	0	0	0	0	0	0	0	0	1	0	0	1	0	0	1	0	0	0	0	0	0	0	0	0	0	0	0	0	0	0	1	0	0	0	0	0
	asparaginase	154	K01424	0.631579	1	0	0	0	1	1	0	1	0	1	1	1	1	0	0	1	1	0	1	1	0	1	1	0	1	0	0	0	1	0	1	1	1	1	1	1	1	1
	L-glutaminase	155	K01425	0.184211	0	0	0	0	0	1	1	0	1	0	0	1	0	0	0	0	0	0	0	0	0	0	0	0	1	0	0	0	1	0	0	0	0	1	0	0	0	0
	glutamate decarboxylase A and B PLP-dependent	156	K01580	0.157895	0	0	0	0	0	1	0	0	0	0	0	1	0	0	0	0	0	0	0	0	0	0	0	0	1	0	0	0	1	0	0	0	0	1	0	0	0	1
	Ornithine Decarboxylase	157	K01581	0	0	0	0	0	0	0	0	0	0	0	0	0	0	0	0	0	0	0	0	0	0	0	0	0	0	0	0	0	0	0	0	0	0	0	0	0	0	0
	selenocysteine lyase PLP-dependent	158	K11717	0.473684	1	0	0	1	1	1	0	0	0	1	1	1	1	0	0	1	1	0	0	0	0	1	0	0	1	0	0	0	0	0	1	1	1	1	1	1	0	0
	alanine racemase	159	K01775	0.921053	1	1	1	1	1	1	1	1	1	1	1	0	1	1	1	1	1	0	1	1	1	1	1	1	1	1	1	0	1	1	1	1	1	1	1	1	1	1
	glutamate racemase	160	K01776	0.684211	1	0	0	1	0	1	0	0	1	1	0	1	1	1	0	1	1	1	0	1	1	1	1	1	1	1	0	0	1	0	1	1	1	1	1	1	1	0
	methionyl-tRNA synthetase	161	K01874	0.868421	1	1	1	1	1	1	0	1	0	1	1	0	1	1	1	1	1	0	1	1	1	1	1	0	1	1	1	1	1	1	1	1	1	1	1	1	1	1
	aspartate-ammonia ligase	162	K01914	0.447368	0	0	1	1	0	0	0	1	0	0	0	0	1	0	0	0	1	0	0	1	1	1	0	0	1	1	1	0	1	1	0	1	1	1	0	1	0	0
	glutathionylspermidine synthase	163	K01460	0	0	0	0	0	0	0	0	0	0	0	0	0	0	0	0	0	0	0	0	0	0	0	0	0	0	0	0	0	0	0	0	0	0	0	0	0	0	0
	Pantothenate Synthetase	164	K01918	0.473684	1	0	0	1	1	1	1	0	1	0	0	1	0	1	0	0	0	0	0	0	0	0	1	1	1	1	0	1	1	1	1	0	0	1	1	0	0	0
	glutathione synthase	165	K01920	0	0	0	0	0	0	0	0	0	0	0	0	0	0	0	0	0	0	0	0	0	0	0	0	0	0	0	0	0	0	0	0	0	0	0	0	0	0	0
	D-alanineD-alanine ligase	166	K01921	0.921053	1	0	1	1	1	1	1	1	1	1	1	1	1	1	1	1	1	0	1	1	1	1	1	0	1	1	1	1	1	1	1	1	1	1	1	1	1	1
	UDP-N-acetylmuramateL-alanine ligase	167	K01924	0.789474	1	1	0	1	1	1	1	1	1	1	0	1	1	1	1	1	0	1	1	1	0	0	0	0	1	1	1	0	1	1	1	1	1	1	1	1	1	1
	UDP-N-acetylmuramoyl-L-alanineD-glutamate ligase	168	K01925	0.815789	1	1	0	1	1	1	1	1	1	1	0	1	0	0	1	1	1	1	0	1	1	1	1	1	1	1	1	0	1	1	1	1	1	1	1	1	0	1
Metabolism of Terpenoids and Polyketides	1-hydroxy-2-methyl-2-E-butenyl 4-diphosphate reductase 4Fe-4S protein	169	K03527	0.894737	1	0	1	1	0	1	1	1	1	1	1	0	1	1	1	1	1	1	1	1	1	1	1	1	1	1	1	0	1	1	1	1	1	1	1	1	1	1
	Transketolase	170	K00615	0.842105	1	1	1	1	1	1	1	0	0	1	1	0	1	1	0	1	1	0	1	1	1	1	1	1	1	1	1	1	1	1	1	1	1	1	1	1	1	0
	acetyl-CoA acyltransferase anaerobic	171	K00632	0	0	0	0	0	0	0	0	0	0	0	0	0	0	0	0	0	0	0	0	0	0	0	0	0	0	0	0	0	0	0	0	0	0	0	0	0	0	0
	geranyltranstransferase	172	K00795	0	0	0	0	0	0	0	0	0	0	0	0	0	0	0	0	0	0	0	0	0	0	0	0	0	0	0	0	0	0	0	0	0	0	0	0	0	0	0
	4-diphosphocytidyl-2C-methyl-D-erythritol synthase	173	K00991	0.657895	0	0	0	1	1	1	1	1	1	1	0	0	1	0	0	0	1	1	1	1	1	0	1	1	1	0	0	0	1	1	1	1	1	1	0	1	1	1
Nucleotide Metabolism	IMP dehydrogenase	174	K00088	0.710526	1	0	0	1	1	1	1	0	0	1	1	0	1	0	0	1	1	0	1	0	0	1	1	1	0	1	1	1	1	1	1	1	1	1	1	1	1	1
	anaerobic ribonucleoside-triphosphate reductase	175	K00527	0	0	0	0	0	0	0	0	0	0	0	0	0	0	0	0	0	0	0	0	0	0	0	0	0	0	0	0	0	0	0	0	0	0	0	0	0	0	0
	thioredoxin reductase FAD-NADP-binding	176	K00384	0.578947	1	0	0	1	1	1	0	1	1	1	0	1	0	0	1	1	0	1	0	1	0	0	1	0	1	1	1	0	1	0	1	1	0	1	1	0	0	1
	purine-nucleoside phosphorylase	177	K03783	0.5	1	0	0	1	1	1	0	0	1	0	0	1	0	0	0	1	1	0	0	1	0	0	0	1	1	1	0	0	1	1	1	0	0	1	1	1	1	0
	uridine phosphorylase	178	K00757	0.394737	0	0	0	1	0	1	1	1	0	0	0	1	0	0	1	1	1	0	1	0	0	0	0	0	1	0	0	0	1	1	1	1	0	1	0	0	0	0
	thymidine phosphorylase	179	K00758	0	0	0	0	0	0	0	0	0	0	0	0	0	0	0	0	0	0	0	0	0	0	0	0	0	0	0	0	0	0	0	0	0	0	0	0	0	0	0
	cytidylate kinase	180	K13800	0	0	0	0	0	0	0	0	0	0	0	0	0	0	0	0	0	0	0	0	0	0	0	0	0	0	0	0	0	0	0	0	0	0	0	0	0	0	0
	cytosine deaminase	181	K01485	0	0	0	0	0	0	0	0	0	0	0	0	0	0	0	0	0	0	0	0	0	0	0	0	0	0	0	0	0	0	0	0	0	0	0	0	0	0	0
	ADP-ribose pyrophosphatase	182	K01515	0.421053	0	0	0	1	0	0	0	1	0	1	1	0	1	0	0	0	1	0	1	0	1	0	1	1	0	1	1	0	0	1	0	1	0	0	0	1	1	0
	orotidine-5-phosphate decarboxylase	183	K01591	0.789474	1	0	0	1	0	1	1	1	1	1	1	0	1	1	1	1	0	0	1	0	1	0	1	1	1	1	1	1	1	1	1	1	1	1	1	1	1	1
	phosphoribosylglycinamide synthetase phosphoribosylamine-glycine ligase	184	K01945	0.842105	1	0	0	1	1	1	0	0	1	1	1	1	1	1	0	1	1	1	1	1	0	1	1	1	1	1	1	1	1	1	1	1	1	1	1	1	1	1
	adenylosuccinate synthetase	185	K01939	0.815789	1	0	1	1	1	1	1	0	1	1	1	0	1	1	0	1	1	1	1	1	1	0	0	1	1	1	1	0	1	1	1	1	1	1	1	1	1	1
	carbamoyl phosphate synthetase small subunit glutamine amidotransferase	186	K01955	0.631579	1	0	0	1	1	1	0	0	1	0	0	0	1	0	1	0	0	1	1	0	1	0	0	1	1	1	1	1	0	1	1	1	1	1	1	1	1	1
Translation	L-Seryl-tRNASec selenium transferase	187	K01042	0.105263	0	0	0	0	0	0	0	0	0	0	1	0	0	1	0	0	1	0	0	0	0	0	0	0	0	0	0	0	0	0	0	0	1	0	0	0	0	0
	methionyl-tRNA synthetase	188	K01874	0.868421	1	1	1	1	1	1	0	1	0	1	1	0	1	1	1	1	1	0	1	1	1	1	1	0	1	1	1	1	1	1	1	1	1	1	1	1	1	1
	Serine-tRNA ligase	189	K01875	0.815789	1	1	1	1	1	1	1	1	1	1	1	1	0	1	0	1	1	0	1	1	1	0	1	0	1	1	1	0	1	1	1	0	1	1	1	1	1	1
